1 **Title**

2 Low-Dimensional Spatio-Temporal Dynamics Underlie Cortex-Wide Neural Activity

3 **Authors**

4 Camden J. MacDowell<sup>1,2,3</sup> and Timothy J. Buschman<sup>1,4,\*</sup>

5 1. Princeton Neuroscience Institute, Princeton University, Princeton, NJ, 08540, USA

6 2. Department of Molecular Biology, Princeton University, Princeton, NJ, 08540, USA

7 3. Rutgers Robert Wood Johnson Medical School, Piscataway, NJ, 08854, USA

8 4. Department of Psychology, Princeton University, Princeton, NJ, 08540, USA

9

10 \* lead contact and corresponding author

11

12 **Abstract**

13 Cognition arises from the dynamic flow of neural activity through the brain. To capture these  
14 dynamics, we used mesoscale calcium imaging to record neural activity across the dorsal cortex  
15 of awake mice. We found that the large majority of variance in cortex-wide activity (~75%) could  
16 be explained by a limited set of ~14 ‘motifs’ of neural activity. Each motif captured a unique spatio-  
17 temporal pattern of neural activity across the cortex. These motifs generalized across animals  
18 and were seen in multiple behavioral environments. Motif expression differed across behavioral  
19 states and specific motifs were engaged by sensory processing, suggesting the motifs reflect core  
20 cortical computations. Together, our results show that cortex-wide neural activity is highly  
21 dynamic, but that these dynamics are restricted to a low-dimensional set of motifs, potentially to  
22 allow for efficient control of behavior.

23 **Introduction**

24 The brain is a complex, interconnected network of neurons. Neural activity flows through this  
25 network, carrying and transforming information to support behavior. Previous work has associated  
26 particular computations with specific spatio-temporal patterns of neural activity across the brain  
27 (Buschman and Miller, 2007; Stringer et al., 2019a; Hutchison et al., 2013). For example,  
28 sequential activation of primary sensory and then higher-order cortical regions underlies  
29 perceptual decision making in both mice (Guo et al., 2014) and monkeys (Romo and de Lafuente,  
30 2013; Siegel et al., 2011). Similarly, specific spatio-temporal patterns of cortical regions are  
31 engaged during goal-directed behaviors (Allen et al., 2017), motor planning (Chen et al., 2017),  
32 evidence accumulation (Pinto et al., 2019), motor learning (Makino et al., 2017), and sensory  
33 processing (Mohajerani et al., 2013). Previous work has begun to codify these dynamics, either  
34 in the synchronous activation of brain regions (Fries, 2015; Hutchison et al., 2013) or in the  
35 propagation of waves of neural activity within and across cortical regions (Muller et al., 2018;  
36 Zanos et al., 2015). Together, this work suggests cortical activity is highly dynamic, evolving over  
37 both time and space, and that these dynamics play a computational role in cognition (Buonomano  
38 and Maass, 2009; Miller and Wilson, 2008).

39 However, despite this work, the nature of cortical dynamics is still not well understood. Previous  
40 work has been restricted to specific regions and/or specific behavioral states and so, we do not  
41 yet know how neural activity evolves across the entire cortex, whether dynamics are similar across  
42 individuals, or how dynamics relate to behavior. This is due, in part, to the difficulty of quantifying  
43 the spatio-temporal dynamics of neural activity across the brain.

44 To address this, we used mesoscale imaging to measure neural activity across the dorsal cortical  
45 surface of the mouse brain (Silasi et al., 2016). Then, using a convolutional factorization  
46 approach, we identified dynamic ‘motifs’ of cortex-wide neural activity. Each motif captured a  
47 unique spatio-temporal pattern of neural activity as it evolved across the cortex. Importantly,

48 because motifs captured the dynamic flow of neural activity across regions, they explained cortex-  
49 wide neural activity better than ‘functional connectivity’ network measures.

50 Surprisingly, the motifs clustered into a limited set of ~14 different spatio-temporal ‘basis’ motifs  
51 that were consistent across all animals. The basis motifs captured the majority of the variance in  
52 neural activity in different behavioral states and in multiple sensory and social environments.  
53 Specific motifs were selectively engaged by each environment and by sensory stimuli, suggesting  
54 the motifs reflect core cortical computations, such as visual or tactile processing. Together, our  
55 results suggest cortex-wide neural activity is highly dynamic but that these dynamics are low-  
56 dimensional: they are constrained to a small set of possible spatio-temporal patterns.

## 57 **Results**

### 58 Discovery of spatio-temporal motifs of cortical activity in awake, head-fixed mice

59 We performed widefield ‘mesoscale’ calcium imaging of the dorsal cerebral cortex of awake,  
60 head-fixed mice expressing the fluorescent calcium indicator GCaMP6f in cortical pyramidal  
61 neurons (Fig. 1A; see Methods for details, Chen et al., 2013). A translucent-skull prep provided  
62 optical access to dorsal cortex, allowing us to track the dynamic evolution of neural activity across  
63 multiple brain regions, including visual, somatosensory, retrosplenial, parietal, and motor cortex  
64 (Fig. 1A, inset and Fig. 1 supplement 1, Silasi et al., 2016). We initially characterized the dynamics  
65 of ‘spontaneous’ neural activity when mice were not explicitly performing a specific behavior (Fig.  
66 1B, N=48 sessions across 9 mice, 5-6 sessions per mouse, each session lasted 12 minutes,  
67 yielding a total of 9.6 hours of imaging). These recordings revealed rich dynamics in the spatio-  
68 temporal patterns of neural activity across the cortex (Supplemental Movie 1, as also seen by  
69 Cramer et al., 2019; Shimaoka et al., 2019; Murphy et al., 2016; Mohajerani et al., 2013)

70 Our goal was to capture, quantify, and characterize the dynamic patterns of activity in an unbiased  
71 manner. To do so, we used convolutional non-negative matrix factorization (CNMF, Mackevicius

72 et al., 2019) to discover repeated spatio-temporal patterns in the neural activity, in an  
73 unsupervised way (Fig. 1C; see Methods and Fig. 1 supplement 2 for details, including robustness  
74 to parameters). CNMF identified ‘motifs’ of neural activity; these are dynamic patterns of neural  
75 activity that extend over space and time (Fig. 1C, bottom left, shows an example motif and the  
76 corresponding original data). Once identified, the algorithm uses these motifs to reconstruct the  
77 original dataset by temporally weighting them across the entire recording session (Fig. 1C;  
78 transients in temporal weightings indicate motif expression, see Supplemental Movie 2 for  
79 comparison of reconstruction to original data). Importantly, overlapping temporal weightings  
80 between motifs are penalized, which biases factorization towards only one motif being active at a  
81 given point in time. This allows us to capture the spatio-temporal dynamics of neural activity as a  
82 whole, rather than decomposing activity into separate spatial and temporal parts (see Methods  
83 for details).

84 Figure 1D shows three example motifs identified by CNMF from a single 2-minute recording  
85 epoch. Many of the identified motifs show dynamic neural activity that involves the sequential  
86 activation of multiple regions of cortex (top two rows in Fig. 1D). For example, example motif 1  
87 starts in somatosensory/motor regions and, over the course of a few hundred milliseconds,  
88 propagates posteriorly before ending in the parietal and visual cortices (Fig. 1D, top row). To aid  
89 in visualizing these dynamics, the arrows overlaid on Figure 1D show the direction and magnitude  
90 of activity propagation of the top 50% most active pixels between subsequent timepoints (as in  
91 Afrashteh et al., 2017; see Methods for details). Other motifs were more spatially restricted,  
92 engaging either one (or more) brain regions simultaneously (e.g. third row in Fig. 1D). In total, we  
93 identified 2622 motifs across 144 different 2-minute epochs of imaging (3 independent epochs  
94 from each of 48, 12-minute recording sessions; Fig. 1B, light blue ‘discovery epochs’).

95 Motifs captured the flow of activity across the brain during a brief time period (~1 second). By  
96 tiling different motifs across time, the entire 2-minute recording epoch could be reconstructed. On

97 average, each 2-minute recording epoch could be reconstructed by combining ~19 motifs (Fig  
98 2A. median; 95% Confidence Interval (CI): 18-20). This captured 89.05% of the total variance of  
99 neural activity on average (Fig. 2B; 89.05% median explained variance, CI: 87.78-89.68%; N=144  
100 discovery epochs; see Methods for details). To achieve this, individual motifs occurred repeatedly  
101 during a recording session. Over half of the motifs occurred at least 3 times during a 2-minute  
102 epoch, with motifs occurring 2.48 times per minute on average (Fig. 2C; CI: 2.38-2.59). The broad  
103 distribution of the frequency of motifs suggests all motifs are required to explain cortex-wide  
104 neural activity. Indeed, the cumulative percent explained variance (PEV) in neural activity  
105 captured by individual motifs shows a relatively gradual incline (Fig. 2D, see Methods for details).  
106 On average, no single motif captured more than 20% of the variance of the recording epoch, and  
107 14 motifs were needed to capture over 90% of the relative PEV. Importantly, the number of  
108 discovered motifs and their explained variance was robust to the changes in the regularization  
109 hyperparameter of the CNMF algorithm, suggesting it is a true estimate of the number of motifs  
110 needed and not a consequence of our analytical approach (Fig. 1 supplement 2, see Methods for  
111 details).

### 112 Motifs capture the dynamic flow of neural activity across the cortex

113 Next, we tested whether motifs simply reflected the co-activation of brain regions or if they  
114 captured the dynamic flow of neural activity between regions. Previous work has found neural  
115 activity can be explained by the simultaneous activation of a coherent network of brain regions  
116 (i.e. zero-lag, first-order correlations, as seen in functional connectivity analyses; Hutchison et al.,  
117 2013). The CNMF approach used here is a generalization of such approaches; it can capture  
118 spatio-temporal dynamics in the motifs, but it is not required to do so if dynamics are not  
119 necessary to capture variance in neural activity. Therefore, to test whether neural activity is  
120 dynamic, we tested whether dynamics were a necessary component of the motifs.

121 First, we determined whether motifs simply reflected the static engagement of a network of  
122 regions. To this end, we measured the autocorrelation of neural activity during the timecourse of  
123 each motif. Consistent with dynamic motifs, the correlation of activity patterns within a motif  
124 quickly decayed with time (Fig. 3A; mean half-life  $\tau$  across all motifs was 113ms +/- 2ms,  
125 bootstrap; when fit to individual motifs, 25%-50%-75% of  $\tau$  was 66ms - 117ms - 210ms; see  
126 Methods for details). While activity patterns at adjacent motif timepoints (75ms apart) were  
127 spatially correlated (Pearson's  $r=0.39$  CI: 0.38-0.40,  $p<10^{-16}$ , Wilcoxon Signed-Rank Test versus  
128  $r=0$ , right-tailed;  $N=2622$  Motifs), this similarity quickly declined when time points were farther  
129 apart (Pearson's  $r=0.098$  CI: 0.095-0.10 at 375ms and  $r=0.043$ , CI: 0.039-0.047 at 600ms; a  
130 decrease of 0.29 and 0.35, both  $p<10^{-16}$ , Wilcoxon Signed-Rank Test). Similarly, the mean spatial  
131 pattern of activity of a given motif, averaged across the timecourse of the motif, was dissimilar  
132 from individual timepoints within the motif (Fig. 3B; median dissimilarity 0.58, CI: 0.57-0.58 across  
133 motifs).

134 Second, we tested whether dynamics were necessary to fit neural data. To do this, we compared  
135 the fit of CNMF-derived motifs to alternative decomposition approaches that do not consider  
136 temporal dynamics. We used two 'static' decomposition techniques that are standards in the field:  
137 spatial Principal Components Analysis (sPCA) and spatial Non-Negative Matrix Factorization  
138 (sNMF; see Methods for details). Both approaches required >3 times more dimensions to capture  
139 the same amount of variance as the motifs (Fig. 3E; on average, 64.5 and 93 dimensions for  
140 sPCA and sNMF, respectively). If restricted to 19 dimensions, sPCA and sNMF explained  
141 significantly less variance in neural activity than motifs (Fig. 3E; sPCA: 79.87% CI: 78.72-81.46%  
142 a difference of 9.18%,  $p<10^{-16}$ ; sNMF 77.95% CI: 76.63-79.42% a difference of 11.10%,  $p<10^{-16}$ ,  
143 Wilcoxon Signed-Rank Test). Although there are differences in the number of terms in each  
144 dimension, the fact that dynamic motifs can capture significantly more variance than temporally

145 constrained approaches suggests brain activity has complex spatial-temporal dynamics that are  
146 not captured by traditional decomposition methods but can be captured by our motifs.

#### 147 Motifs generalize to withheld data and across animals

148 If the neural dynamics captured by CNMF reflect true, repeated, motifs of neural activity, then the  
149 motifs identified in one recording session should generalize to other recording sessions. To test  
150 if motifs generalized, we refit the motifs identified during a recording 'discovery' epoch to withheld  
151 data (Fig. 1B, purple, N=144 'withheld epochs'). Motifs were fit to new epochs by only optimizing  
152 the motif weightings over time (i.e. not changing the motifs themselves, see Methods for details).

153 Indeed, the motifs generalized; the same motifs could explain 74.82% of the variance in neural  
154 activity in withheld data from the same recording session (Fig. 3D, purple, CI: 73.92-76.05%; see  
155 Fig. 3 supplement 1A for robustness to sparsity parameter; see Methods for details). This was  
156 not just due to fitting activity on average: motifs captured neural activity at each timepoint during  
157 a recording epoch, explaining the majority of the variance in the spatial distribution of neural  
158 activity in any given frame (60-80%, Fig. 3 supplement 1B).

159 Dynamics were important for the ability to generalize. To show this, we created 'static networks'  
160 by averaging neural activity across the timecourse of each motif. This maintained the overall  
161 spatial pattern of activity, ensuring the same network of brain regions was activated, but removed  
162 any temporal dynamics within a motif (Fig. 3E; see Methods for details). When the static networks  
163 were fit to withheld data, they captured significantly less variance in neural activity compared to  
164 the dynamic motifs (Fig. 3D, gray; static networks captured 55.50%, CI: 53.74-57.09%; a 19.32%  
165 reduction,  $p < 10^{-16}$ , Wilcoxon Signed-Rank Test).

166 Similarly, motifs generalized across animals: motifs identified in one animal cross-generalized to  
167 capture 68.19% of the variance in neural activity in other animals (Fig; 4A, green; CI: 66.74-  
168 69.35%, a decrease of 6.63% compared to generalizing within animals, purple,  $p < 10^{-16}$ , Wilcoxon

169 Signed-Rank Test; N=144 withheld epochs; see Methods for details). Together, our results show  
170 motifs can generalize across recording session and across animals, suggesting they reflect  
171 repeated spatio-temporal dynamics in neural activity.

#### 172 Motifs cluster into a low-dimensional set of basis motifs

173 The ability of motifs to generalize across time and animals suggests there may be a set of ‘basis  
174 motifs’ that capture canonical patterns of spatio-temporal dynamics. To identify these basis motifs,  
175 we used an unsupervised clustering algorithm to cluster all 2622 motifs that were identified across  
176 all discovery epochs (clustering done with the Phenograph algorithm using peak of cross-  
177 correlation as the distance metric between motifs, Nicosia et al., 2009; Levine et al., 2015, see  
178 Methods for details). Motifs clustered into a set of 14 unique groups (Fig. 4B). For each cluster,  
179 we defined the basis motif as the mean of the motifs within the ‘core-community’ of each cluster  
180 (taken as those motifs with the top 10% most within-cluster nearest neighbors, see Methods for  
181 details).

182 Similar to the motifs discovered within a single session, the basis motifs captured the dynamic  
183 engagement of one or more brain regions (Fig. 4C; all basis motifs shown in Supplemental Movie  
184 3). While some basis motifs engaged a single brain region (e.g. motif 3, Fig. 4C), most of the  
185 basis motifs captured the propagation of activity across cortex. For example, motif 4 captures the  
186 posterior-lateral flow of activity from retrosplenial to visual cortex. Similarly, motif 11 captures a  
187 cortex-wide anterior-to-posterior wave of activity that has been previously studied (Greenberg et  
188 al., 2018; Matsui et al., 2016; Mitra et al., 2018). As expected, these dynamics were similar to  
189 those found in individual recording sessions (e.g. basis motif 9 matches example motif 2 in Fig.  
190 1D).

191 At the same time, the same brain region, or network of regions, can be engaged in multiple basis  
192 motifs. For instance, parietal cortex is engaged in motifs 3, 5 and 8 (Fig. 4C). In motif 3, neural



193 activity remains local to parietal cortex for the duration of the motif. However, in motif 5 parietal  
194 activity is prefaced by a burst of activity in rostralateral cortex. In motif 8, activity starts in parietal  
195 areas before spreading across the entire dorsal cortex. Similarly, several motifs (6, 8, 11, and 14)  
196 involve coactivation of a network of anterolateral somatosensory and primary motor cortices; a  
197 coupling observed in previous mesoscale imaging studies (Musall et al., 2019; Silasi et al., 2016;  
198 Vanni et al., 2017). Thus, basis motifs reflect the ordered engagement of multiple brain regions,  
199 likely reflecting a specific flow of information through the brain.

200 Basis motifs explained the large majority of the variance in neural activity across animals (73.91%  
201 CI: 73.14-75.19%, Fig. 4A, orange; N=144 withheld epochs). This is about the same amount of  
202 variance explained by motifs defined within the same animal (Fig. 4A, purple vs. orange; a 0.91%  
203 reduction,  $p=0.074$ ; Wilcoxon Signed-Rank Test, N=144 withheld epochs). It is significantly more  
204 variance explained than when using motifs defined in another animal (Fig. 4A, orange vs. green  
205 plots; a 5.72% increase in explained variance;  $p<10^{-16}$ , Wilcoxon Signed-Rank Test). This  
206 improvement is likely because basis motifs are averaged across many instances, removing the  
207 spurious noise that exists in individual motifs and resulting in a better estimate of the underlying  
208 'true' motif that exist across animals.

209 As before, dynamics were important for basis motifs; when spatial-temporal dynamics were  
210 removed, the variance explained dropped significantly (Fig. 4A, gray vs orange plots; static  
211 networks captured 48.99% CI: 47.15-51.30% of variance, 24.92% less than dynamic motifs,  $p<10^{-16}$ ,  
212 N=144 withheld epochs, Wilcoxon Signed-Rank Test). Furthermore, all basis motifs were  
213 necessary to explain neural activity; the cumulative PEV of motifs followed a gradual rise and no  
214 basis motif contributed less than 2% of relative PEV on average (Fig. 4 supplement 1A).

215 The high explanatory power of the 14 basis motifs suggests they provide a low-dimensional basis  
216 for capturing the dynamics of neural activity in the cortex. This is consistent with the number of  
217 motifs (~19) identified in each recording session (the slightly lower number of basis motifs could

218 reflect spurious noise in individual sessions). Importantly, the number of discovered basis motifs  
219 was robust to CNMF parameters (Fig. 4 supplement 1B) and potential hemodynamic contributions  
220 to basis motifs were minimal (Fig. 4 supplement 2, see Methods for details). In addition, the low  
221 number of basis motifs was not due to the resolution of our approach. We estimated the functional  
222 resolution of our imaging approach by correlating pixels across time (Fig. 4 supplement 3). This  
223 revealed ~18 separate functional regions in dorsal cortex (Fig. 4 supplement 3). Individual motifs  
224 engaged multiple of these regions over time (Fig. 4C and supplement 3), consistent with the idea  
225 that motifs were not constrained by our imaging approach. Indeed, the number of motifs observed  
226 was substantially less than the possible number of motifs; even if motifs engaged only 1-2 of these  
227 regions, there are still  $18^2=324$  different potential motifs, much higher than the 14 we observed.  
228 Finally, low dimensionality of basis motifs was not due to compositionality of motifs across time,  
229 as this was penalized in the discovery algorithm and the temporal dependency between motifs  
230 was weak (Fig. 4 supplement 4; see Methods for details).

### 231 Basis motifs generalize across behaviors

232 So far, we have only described the motifs of neural activity in animals 'at rest'. To test whether  
233 these same motifs can explain neural activity in multiple behavioral states, we imaged dorsal  
234 cortex while animals were engaged in a variety of behaviors.

235 To begin, we measured the expression of basis motifs in different spontaneous behavioral states.  
236 Two mice, which were not used to define the original basis motifs, were imaged for 1 hour while  
237 head-fixed on a transparent treadmill (Fig. 5A). As with the original mice, basis motifs captured  
238 the majority of variance in neural activity in both animals (Mouse 1: 64.42%, Mouse 2: 66.66%).  
239 The ability of basis motifs to generalize outside the set of animals in which they were discovered  
240 provides further support for the idea that basis motifs capture core, repeated, spatio-temporal  
241 dynamics in neural activity.

242 Next, we were interested in whether basis motifs were specific to different behavioral states in the  
243 freely behaving mice. Building from recent work, we used infrared cameras to track three different  
244 behavior measures: limb speed, whisker pad motion energy, and nose motion energy (Mathis et  
245 al., 2018; Musall et al., 2019). To classify behavioral state at each point in time, we fit a gaussian  
246 mixed model to the distribution of these three measures (Fig. 5B; see Methods for details).  
247 Behavior fell into two broad categories: an 'active' state (high whisker pad energy, low nose  
248 motion energy, high limb speed) and an 'inactive' state (low whisker pad energy, high nose motion  
249 energy, low limb speed; Fig 5A). Behavioral states typically lasted for several seconds (median  
250 duration for active states: 2.65s and 2.46s; inactive states: 7.88s and 11.54s in mouse 1 and 2  
251 respectively), a longer timescale than the motifs (which are all less than 1 second).

252 All motifs occurred in both behavioral states (Fig. 5B-C). Follow-up, detailed analyses did not find  
253 specific motifs were associated with any specific behaviors, at least as captured by our three  
254 tracked measures of behavior (i.e. no motif was associated with grooming, onset of walking,  
255 stopping walking, paw repositioning, sniffing, whisking, etc.; data not shown). However, the  
256 activity of motifs did vary across the two broad behavioral states (Fig. 5B-C; the activity of 9/14  
257 and 10/14 motifs were different across behavioral states at  $p < 0.05$  in Mouse 1 and 2, respectively,  
258 Mann-Whitney U-test; this is significantly more than chance,  $p = 10^{-11}$  and  $p = 10^{-12}$ , binomial test).  
259 Similarly, the distribution of motif responses could be used to classify which behavioral state the  
260 animal was in (mean classification AUC was 63.42% and 66.51% on withheld data, 99/100 cross-  
261 validations were above chance for both animals, 50%; see Methods for details). Therefore, while  
262 motifs were not specific to an individual behavioral state, how often a motif was expressed differed  
263 across states.

264 Similar results were seen when animals were engaged in social behaviors. Using a novel paired-  
265 imaging paradigm, two mice were simultaneously imaged under the same widefield microscope  
266 (Fig. 5D; see Methods for details). Mice were head-fixed near one another (~5mm snout-to-snout),

267 enabling sharing of social cues (e.g. whisking, sight, vocalizations, olfaction). To add richness to  
268 the sensory environment, mice were intermittently exposed to ‘auditory movies’ that consisted of  
269 male mouse vocalizations and synthetic tones (see Methods for details). In this way, the social  
270 environment provided a rich, unstructured sensory environment that is fundamentally different  
271 from the solo, low-sensory environment used to define the basis motifs. Even in this vastly  
272 different environment, basis motifs defined in the original environment captured 73.41% (CI:  
273 71.85-75.23%) of the variance in neural activity (Fig. 5E, right orange plot). This was similar to  
274 the variance explained in the solo environment (Fig. 5E, left orange plot; 73.91% CI: 73.14-  
275 75.19%; difference between the solo and social environments=0.50%,  $p=0.49$ ,  $N=144$  solo  
276 epochs,  $N=123$  social epochs; Mann-Whitney U-test). Similarly, the opposite was generally true:  
277 11 basis motifs were identified in the social recordings, which captured slightly less of the neural  
278 activity in the solo environment (Fig. 5E blue plots; solo=70.83% CI: 69.77-72.09%,  
279 social=73.72% CI: 71.54-75.05%; difference=2.89%,  $p=0.0047$ , Mann-Whitney U-test).

280 As before, many basis motifs changed their expression when the behavioral state of the animal  
281 changed. Half of the basis motifs had a significant change in their relative explained variance in  
282 the social environment compared to baseline (Fig. 5F; 7/14 were different at  $p_{\text{Bonferroni}} < 0.05$ , Mann-  
283 Whitney U-test; significantly more than chance,  $p=10^{-16}$ , binomial test). Given the nature of social  
284 interactions in mice, one would expect tactile- and visual-associated motifs to be increased.  
285 Consistent with this prediction, the motifs elevated in the social environment (motifs 1, 9, and 10)  
286 involved somatosensory and/or visual regions (Fig. 5G and 4C).

### 287 Specific motifs capture visual and tactile sensory processing

288 To begin to understand the computational role of specific motifs, we measured the response of  
289 the motifs to tactile and visual stimuli (Fig. 6A, see Methods for details). Solo, awake mice ( $N=9$ )  
290 were imaged while presented with either moving gratings on a screen or airpuffs to their whiskers  
291 (see Methods for details). As before, the distribution of motifs differed between both sensory

292 environments and the original, resting environment; a large proportion of motifs showed a  
293 significant change in their relative PEV (Fig. 6B-C: visual: 9/14, tactile: 11/14, significantly different  
294 at  $p_{\text{Bonferroni}} < 0.05$ , Mann-Whitney U-test; N=1109 visual and N=1110 tactile presentations, N=144  
295 original epochs). Most of these changes were reductions in explained variance, with only a few  
296 motifs increasing their expression to the stimuli (Fig. 6B-C).

297 Specific motifs were evoked in response to visual or tactile stimulation. Motif 10 was selectively  
298 induced by visual stimulation (Fig. 6D), while motif 1 was selectively induced by tactile stimulation  
299 (Fig. 6E). Consistent with a role in sensory processing, both motifs had increased expression in  
300 their respective environments (Fig. 6B-C). Furthermore, the spatio-temporal pattern of activity in  
301 each motif matched the trial-averaged response to the associated stimulus; motif 10 captured  
302 activity in visual cortex, while motif 1 captured activity in motor, somatosensory and parietal  
303 cortices (Fig. 6F). Reflecting their overlap, both motifs were significantly correlated with the trial-  
304 averaged response (Fig. 6F, and Pearson's  $R=0.81$ ,  $p < 10^{-16}$ , for correlation between the average  
305 visual response and motif 10, and  $R=0.90$ ,  $p < 10^{-16}$ , for correlation between the average tactile  
306 response and motif 1, all taken during the 13 timepoints post stimulation onset).

307 While certain basis motifs captured the sensory-evoked neural activity, other motifs were able to  
308 capture trial-by-trial 'noise' in neural activity. For both stimuli, basis motifs, identified at rest,  
309 captured the majority of the variance in neural activity (Fig. 6G; visual: 58.13% CI: 57.11-59.18%;  
310 tactile: 62.37% CI: 61.42-63.62%, N=1110 tactile and 1109 visual stimulus presentations; see  
311 Methods for details). This was significantly more variance than could be explained by the mean  
312 response to each sensory stimulus alone (Fig. 6G; Mean response fits: visual: 17.25% CI: 16.61-  
313 17.72%; tactile: 34.42% CI: 33.34-35.40%; difference between motif and mean fits: visual:  
314 40.88%,  $p < 10^{-16}$ ; tactile: 27.95%,  $p < 10^{-16}$ ; Wilcoxon Signed-Rank Test). This highlights the high  
315 variability in responses to a sensory stimulus across trials. Typically, such variability would be  
316 discarded as 'noise' unrelated to sensory processing. Instead, our results suggest this variability

317 has structure: it is due to the engagement of other motifs that are, presumably, related to other,  
318 ongoing, computations.

319 Finally, we sought to determine whether motifs reflect general stimulus processing or specific  
320 stimulus features. To this end, we compared motif expression in response to two visual stimuli  
321 (Fig. 7; gratings moving medial to lateral or lateral to medial; see Methods for details and Fig. 7  
322 supplement 1 for similar analysis of tactile stimuli). Unlike comparisons across sensory modalities,  
323 the relative percent explained variance in neural activity captured by each basis motif was the  
324 same for both visual stimuli ( $p > 0.24$  for all 14 motifs; Mann-Whitney U-Test;  $N = 554$  and  $555$   
325 stimulus presentations for medial to lateral and lateral to medial grating respectively). For  
326 example, the visually responsive motif 10 responded equally to both stimuli (Fig. 7A). This was  
327 not due to limits in spatial resolution of our imaging approach or analytical smoothing. Figure 7B  
328 shows pixel-wise classification of the same data can decode stimulus identify ( $p = 0.022$ ,  $N = 9$   
329 animals, one-sample t-test; see Methods for details). However, the same classification analysis  
330 on data reconstructed from motif activity failed to distinguish between stimuli ( $p = 0.87$ ,  $N = 9$   
331 animals, one-sample t-test; difference between classification on original and reconstructed data  
332 was significant,  $p = 0.016$ , paired sample t-test). Thus, the specifics of visual stimuli were encoded  
333 in the residuals after fitting the motifs. However, these details contributed minimally to the overall  
334 neural activity during the stimulus. The stimulus-specific residuals captured only  $3.85\% \pm 0.70\%$   
335 SEM of the explainable variance (Fig. 7C). In contrast, motifs captured the vast majority of  
336 explainable variance ( $19.23\% \pm 3.23\%$  SEM for stimulus-specific motif 10;  $76.92\% \pm 3.86\%$   
337 SEM, for remaining motifs; Fig. 7C). Taken together, our results show that motifs capture large-  
338 scale patterns of neural activity but are generally agnostic to the finer-grain local activity that  
339 captured specifics of stimuli. This is consistent with the idea that motifs capture the broader flow  
340 of information across cortical regions.

## 341 **Discussion**

342 Spatio-temporal dynamics of cortex-wide activity

343 Our results show that neural activity is highly dynamic, evolving in both time and space.  
344 Leveraging mesoscale calcium imaging in mice, we tracked the spatio-temporal dynamics of  
345 neural activity across the dorsal surface of the cortex. Using a convolutional factoring analysis,  
346 we identified ‘motifs’ in neural activity. Each motif reflected a different spatio-temporal pattern of  
347 activity, with many motifs capturing the sequential activation of multiple, functionally diverse,  
348 cortical regions (Figs. 1-3). Together, these motifs explained the large majority of variance in  
349 neural activity across different animals (Fig. 4) and in novel behavioral situations (Fig. 5-6).

350 A couple of the motifs captured patterns of activity observed in previous work, supporting the  
351 validity of the CNMF approach. For example, previous work has studied spatio-temporal waves  
352 of activity that propagate anterior-to-posteriorly across the cortex at different temporal scales  
353 (Greenberg et al., 2018; Matsui et al., 2016; Mitra et al., 2018). Our motifs (1 and 11) recapitulate  
354 these waves, along with their temporal diversity (motif 1 = fast, motif 11 = slow). In addition to  
355 these motifs, we also discovered several additional, spatio-temporally distinct, anterior-to-  
356 posterior propagating waves (motifs 2, 4, and 9).

357 Similarly, brain regions that were often co-activated in motifs were aligned with previously  
358 reported spatial patterns of co-activation in the mouse cortex (Musall et al., 2019; Silasi et al.,  
359 2016; Vanni et al., 2017). For example, motifs 6, 8, 11, and 14 include coactivation of anterolateral  
360 somatosensory and motor regions. This pattern is observed often and reflects the close functional  
361 relationship between motor activity and somatosensory processing. Here, we extend this work by  
362 showing neural activity can flow within and between these networks in different ways.

363 Relatedly, previous work using mesoscale imaging demonstrated that the mouse cortex exhibits  
364 repeating patterns of activity (Mohajerani et al., 2013). However, this work relied on identifying  
365 average patterns evoked by sensory stimuli (visual, tactile, auditory) and correlating the spatially

366 and temporally static templates of those patterns to activity in resting animals. As we demonstrate,  
367 stimulus-evoked patterns capture considerably less variance in neural activity than our approach,  
368 even in response to sensory stimuli themselves (average stimuli responses: ~15-35% of activity  
369 versus motifs: ~60%). In addition, previous work has used zero-lag correlations to show the brain  
370 transitions through different functional network states over time (Ashourvan et al., 2017;  
371 Hutchison et al., 2013; Preti et al., 2017; Vidaurre et al., 2017). Here, we show that these  
372 functional network states themselves have rich dynamics, reflecting specific sequential patterns  
373 of activity across the network. By encapsulating these dynamics, motifs are able to capture  
374 significantly more of the variance in neural activity compared to static networks.

#### 375 Motifs of neural activity may reflect cognitive computations

376 Each motif captured a different spatio-temporal pattern of neural activity. As neural activity passes  
377 through the neural network of a brain region, it is thought to be functionally transformed in a  
378 behaviorally-relevant manner (e.g. visual processing in visual cortex or decision-making in parietal  
379 cortex). Therefore, the dynamic activation of multiple regions in a motif, could reflect a specific,  
380 multi-step, ordered transformation of information. In this way, the basis motifs would reflect a set  
381 of 'core computations' carried out by the brain.

382 Consistent with this hypothesis, the distribution of motifs differed across behavioral states (Fig. 5)  
383 and in response to social and sensory stimuli (Figs. 6-7). Specific motifs were also associated  
384 with specific cognitive processes, such as tactile and visual processing (Fig. 7). This follows  
385 previous work showing the engagement of brain networks is specific to the current behavior  
386 (Mattar et al., 2015; Telesford et al., 2016) and that disrupting these networks underlies numerous  
387 pathologies (Badhwar et al., 2017; Braun et al., 2016; Harlalka et al., 2019).

388 In this way, our results are consistent with a hierarchical relationship between behavior and  
389 cortical dynamics. Behavior engages a set of core cognitive computations, reflected in the



390 activation of multiple motifs in each behavioral state (Fig. 5). Multiple behavioral states engage  
391 the same motifs, but they engage them to a different extent. This suggests different behavioral  
392 states do not require independent patterns of neural activities, but rather reflect a re-weighting of  
393 the expression of core computations.

394 Low dimensional structure of cortex-wide dynamics may facilitate cognitive control of neural  
395 activity

396 Our results show that the dynamics of the cortex are low dimensional. Motifs identified in different  
397 animals and recording sessions clustered into a limited set of 14 unique ‘basis’ motifs. This limited  
398 number of basis motifs captured the large majority of variance in neural activity (~75%) across  
399 animals, across behavioral states, and in different behavioral environments. Such a low-  
400 dimensional repertoire of cortical activity is consistent with previous work using zero-lag  
401 correlations of neural activity to measure functional connectivity between brain regions (e.g. 17  
402 functional networks in the human cortex using fMRI, Yeo et al., 2011).

403 Why might cortex-wide neural activity be low dimensional? Given the multitude of sensory inputs,  
404 internal states, and motor actions, one might expect neural activity to be extremely high  
405 dimensional. Indeed, recent large-scale electrophysiology and imaging studies have found high  
406 dimensional (>100) representations within a brain region, with neural activity often representing  
407 small aspects of behavior (e.g. facial twitches, limb position, etc; Stringer et al., 2019a, 2019b;  
408 Lieber and Bensmaia, 2019). However, while this high dimensionality of neural representations is  
409 great for capturing the fullness of an experience, its complexity presents a problem for cognitive  
410 control.

411 In most situations, we do not *a priori* know the exact set of computations to engage. Instead, we  
412 must learn which computations are optimal for the current situation. One way to do this is to  
413 search through the space of possible computations until the ‘best’ computation is found. This

414 could explain the diversity of motifs observed in our animals at rest; the expression of different  
415 motifs reflects the ‘sampling’ of different computations as the animals search for the one that fits  
416 their current, novel, situation. Similarly, the greater consistency in the motifs expressed during  
417 social or sensory environments may reflect a reduction in the uncertainty about what  
418 computations to engage in.

419 However, in this framework, a high dimensionality is costly. As the number of possible  
420 computations (and their neural representations) increases, it becomes harder to find the optimum  
421 (the classic ‘curse of dimensionality’ problem; Bellman, 2003). Therefore, limiting the number of  
422 motifs may make it easier to find a contextually appropriate computation. The caveat to a low  
423 dimensional repertoire of motifs is that it necessitates a coarser sampling of computational space,  
424 which may limit how well the best computation approximates the true optimal computation. In this  
425 way, the dimensionality of dynamics may reflect a trade-off between the time it takes to identify  
426 an appropriate computation and the optimality of that computation.

427 More broadly, our results are consistent with a hierarchical control of information processing in  
428 the brain (Mearns et al., 2019; Deco and Kringelbach, 2017; Ashourvan et al., 2019; Park and  
429 Friston, 2013; Botvinick, 2008). Behavioral state changes slowly and reflects the animal’s broad  
430 behavioral goal (Wiltschko et al., 2015). On a shorter timescale, control mechanisms coordinate  
431 broad dynamics across cortical regions (motifs). This allows the animal to engage in a  
432 behaviorally relevant category of computations (e.g. tactile versus visual processing). High  
433 dimensional representations in local circuits then produce more nuanced processing (e.g. the  
434 specific identity of a visual stimulus). In this way, by activating specific motifs, control processes  
435 could direct the broader flow of information across brain regions (a low-dimensional problem)  
436 while avoiding the difficulty of directing detailed single-neuron processing (a high-dimensional  
437 problem).

438 Future Directions

439 Our approach has several limitations that motivate future research. First, although we are able to  
440 capture a large fraction of the cortex, we are limited to the dorsal cortex and so miss out on lateral  
441 auditory cortex, cortical regions deep along the midline, and all sub-cortical regions. Second, while  
442 we probed activity in several different environments, imaging was always restricted to head-fixed  
443 animals. Third, the number and identity of motifs, as well as the relative contributions of spatial  
444 and temporal dynamics to variance in neural activity, is likely influenced by the nature of our  
445 approach. The relatively slow timecourse of GCaMP6f (Chen et al., 2013), and biases in the  
446 neural activity underlying the calcium signal (Allen et al., 2017; Makino et al., 2017) may have  
447 decreased the spatial resolution and slowed the temporal dynamics. However, it is important to  
448 note that the spatial resolution used in our imaging approach ( $\sim 136 \mu\text{m}^2/\text{pixel}$ ) is higher than the  
449 broad activation of brain regions observed in the motifs and was high enough to capture pixel-  
450 specific information about stimuli beyond the motifs. Furthermore, our functional resolution was  
451 able to distinguish 18 distinct regions. Motifs engaged multiple regions, suggesting motifs were  
452 broader than the functional resolution (and therefore not limited by our approach). Finally, even  
453 given these constraints, the number of potential spatio-temporal patterns is far higher than the 14  
454 basis motifs found.

455 In addition to addressing these limitations, future work is needed to understand the computations  
456 associated with each motif. Here we've used simple behavioral paradigms to associate a few  
457 motifs with sensory processing. However, the computation underlying many of the motifs remains  
458 unknown – by cataloging motif expression across experiments and behaviors, we can begin to  
459 understand the function of each motif and gain a more holistic understanding of how and why  
460 neural activity evolves across the brain in support of behavior.

## 461 **Acknowledgments**

462 The authors thank Lucas Pinto, Morgan Gustison, Marcelo Mattar, Chantal Stern, Alex Libby,  
463 Matt Panichello, Sina Tafazoli, Caroline Jahn, Flora Bouchacourt, Emily Dennis, and Sarah

464 Henrickson for their detailed feedback during the writing of this manuscript. We also thank  
465 Stephan Thiberge for designing and constructing the widefield microscope. We thank the  
466 Princeton Laboratory Animal Resources staff for their support. This work was funded by NIH  
467 DP2 EY025446.

## 468 **References**

469 Afrashteh, N., Inayat, S., Mohsenvand, M., and Mohajerani, M.H. (2017). Optical-flow analysis toolbox  
470 for characterization of spatiotemporal dynamics in mesoscale optical imaging of brain activity.  
471 *Neuroimage* 153, 58–74.

472 Allen, W.E., Kauvar, I.V., Chen, M.Z., Richman, E.B., Yang, S.J., Chan, K., Gradinaru, V., Deverman, B.E.,  
473 Luo, L., and Deisseroth, K. (2017). Global Representations of Goal-Directed Behavior in Distinct Cell  
474 Types of Mouse Neocortex. *Neuron* 94, 891-907 e6.

475 Ashourvan, A., Gu, S., Mattar, M.G., Vettel, J.M., and Bassett, D.S. (2017). The energy landscape  
476 underpinning module dynamics in the human brain connectome. *Neuroimage* 157, 364–380.

477 Ashourvan, A., Telesford, Q.K., Verstynen, T., Vettel, J.M., and Bassett, D.S. (2019). Multi-scale detection  
478 of hierarchical community architecture in structural and functional brain networks. *PLOS ONE* 14,  
479 e0215520.

480 Badhwar, A., Tam, A., Dansereau, C., Orban, P., Hoffstaedter, F., and Bellec, P. (2017). Resting-state  
481 network dysfunction in Alzheimer’s disease: A systematic review and meta-analysis. *Alzheimers Dement*  
482 (Amst) 8, 73–85.

483 Bellman, R.E. (2003). *Dynamic Programming* (Courier Corporation).

- 484 Botvinick, M.M. (2008). Hierarchical models of behavior and prefrontal function. *Trends Cogn Sci* 12,  
485 201–208.
- 486 Brainard, D. (1997). The Psychophysics Toolbox. *Spatial Vision* 10.
- 487 Braun, U., Schafer, A., Bassett, D.S., Rausch, F., Schweiger, J.I., Bilek, E., Erk, S., Romanczuk-Seiferth, N.,  
488 Grimm, O., Geiger, L.S., et al. (2016). Dynamic brain network reconfiguration as a potential  
489 schizophrenia genetic risk mechanism modulated by NMDA receptor function. *Proc Natl Acad Sci U S A*  
490 113, 12568–12573.
- 491 Buonomano, D.V., and Maass, W. (2009). State-dependent computations: spatiotemporal processing in  
492 cortical networks. *Nature Reviews Neuroscience* 10, 113–125.
- 493 Buschman, T.J., and Miller, E.K. (2007). Top-down versus bottom-up control of attention in the  
494 prefrontal and posterior parietal cortices. *Science* 315, 1860–1862.
- 495 Chen, T.-W., Wardill, T.J., Sun, Y., Pulver, S.R., Renninger, S.L., Baohan, A., Schreiter, E.R., Kerr, R.A.,  
496 Orger, M.B., Jayaraman, V., et al. (2013). Ultrasensitive fluorescent proteins for imaging neuronal  
497 activity. *Nature* 499, 295–300.
- 498 Chen, T.-W., Li, N., Daie, K., and Svoboda, K. (2017). A Map of Anticipatory Activity in Mouse Motor  
499 Cortex. *Neuron* 94, 866-879.e4.
- 500 Cramer, J.V., Gesierich, B., Roth, S., Dichgans, M., Düring, M., and Liesz, A. (2019). In vivo widefield  
501 calcium imaging of the mouse cortex for analysis of network connectivity in health and brain disease.  
502 *NeuroImage* 199, 570–584.
- 503 Dana, H., Chen, T.-W., Hu, A., Shields, B.C., Guo, C., Looger, L.L., Kim, D.S., and Svoboda, K. (2014). Thy1-  
504 GCaMP6 Transgenic Mice for Neuronal Population Imaging In Vivo. *PLOS ONE* 9, e108697.

- 505 Deco, G., and Kringelbach, M.L. (2017). Hierarchy of Information Processing in the Brain: A Novel  
506 'Intrinsic Ignition' Framework. *Neuron* *94*, 961–968.
- 507 Fries, P. (2015). Rhythms for Cognition: Communication through Coherence. *Neuron* *88*, 220–235.
- 508 Friston, K.J. (2004). Chapter 49 - Functional Connectivity: Eigenimages and Multivariate Analyses. In  
509 Human Brain Function (Second Edition), R.S.J. Frackowiak, C.D. Frith, R.J. Dolan, C.J. Price, S. Zeki, J.T.  
510 Ashburner, and W.D. Penny, eds. (Burlington: Academic Press), pp. 999–1018.
- 511 Greenberg, A., Abadchi, J.K., Dickson, C.T., and Mohajerani, M.H. (2018). New waves: Rhythmic electrical  
512 field stimulation systematically alters spontaneous slow dynamics across mouse neocortex. *NeuroImage*  
513 *174*, 328–339.
- 514 Guo, Z.V., Li, N., Huber, D., Ophir, E., Gutnisky, D., Ting, J.T., Feng, G., and Svoboda, K. (2014). Flow of  
515 cortical activity underlying a tactile decision in mice. *Neuron* *81*, 179–194.
- 516 Harlalka, V., Bapi, R.S., Vinod, P.K., and Roy, D. (2019). Atypical Flexibility in Dynamic Functional  
517 Connectivity Quantifies the Severity in Autism Spectrum Disorder. *Front Hum Neurosci* *13*, 6.
- 518 Horn, B.K.P., and Schunck, B.G. (1981). Determining Optical Flow. 19.
- 519 Hutchison, R.M., Womelsdorf, T., Allen, E.A., Bandettini, P.A., Calhoun, V.D., Corbetta, M., Della Penna,  
520 S., Duyn, J.H., Glover, G.H., Gonzalez-Castillo, J., et al. (2013). Dynamic functional connectivity: promise,  
521 issues, and interpretations. *Neuroimage* *80*, 360–378.
- 522 Leonardi, N., Richiardi, J., Gschwind, M., Simioni, S., Annoni, J.-M., Schluep, M., Vuilleumier, P., and Van  
523 De Ville, D. (2013). Principal components of functional connectivity: a new approach to study dynamic  
524 brain connectivity during rest. *Neuroimage* *83*, 937–950.

525 Lerner, T.N., Shilyansky, C., Davidson, T.J., Evans, K.E., Beier, K.T., Zalocusky, K.A., Crow, A.K., Malenka,  
526 R.C., Luo, L., Tomer, R., et al. (2015). Intact-Brain Analyses Reveal Distinct Information Carried by SNC  
527 Dopamine Subcircuits. *Cell* *162*, 635–647.

528 Levine, J.H., Simonds, E.F., Bendall, S.C., Davis, K.L., Amir el, A.D., Tadmor, M.D., Litvin, O., Fienberg,  
529 H.G., Jager, A., Zunder, E.R., et al. (2015). Data-Driven Phenotypic Dissection of AML Reveals Progenitor-  
530 like Cells that Correlate with Prognosis. *Cell* *162*, 184–197.

531 Lieber, J.D., and Bensmaia, S.J. (2019). High-dimensional representation of texture in somatosensory  
532 cortex of primates. *Proc Natl Acad Sci U S A* *116*, 3268–3277.

533 Ma, Y., Shaik, M.A., Kozberg, M.G., Kim, S.H., Portes, J.P., Timerman, D., and Hillman, E.M.C. (2016a).  
534 Resting-state hemodynamics are spatiotemporally coupled to synchronized and symmetric neural  
535 activity in excitatory neurons. *PNAS* *113*, E8463–E8471.

536 Ma, Y., Shaik, M.A., Kim, S.H., Kozberg, M.G., Thibodeaux, D.N., Zhao, H.T., Yu, H., and Hillman, E.M.C.  
537 (2016b). Wide-field optical mapping of neural activity and brain haemodynamics: considerations and  
538 novel approaches. *Philos Trans R Soc Lond B Biol Sci* *371*.

539 Mackevicius, E.L., Bahle, A.H., Williams, A.H., Gu, S., Denisenko, N.I., Goldman, M.S., and Fee, M.S.  
540 (2019). Unsupervised discovery of temporal sequences in high-dimensional datasets, with applications  
541 to neuroscience. *Elife* *8*.

542 Makino, H., Ren, C., Liu, H., Kim, A.N., Kondapaneni, N., Liu, X., Kuzum, D., and Komiyama, T. (2017).  
543 Transformation of Cortex-wide Emergent Properties during Motor Learning. *Neuron* *94*, 880-890 e8.

- 544 Mathis, A., Mamidanna, P., Cury, K.M., Abe, T., Murthy, V.N., Mathis, M.W., and Bethge, M. (2018).  
545 DeepLabCut: markerless pose estimation of user-defined body parts with deep learning. *Nature*  
546 *Neuroscience* *21*, 1281–1289.
- 547 Matsui, T., Murakami, T., and Ohki, K. (2016). Transient neuronal coactivations embedded in globally  
548 propagating waves underlie resting-state functional connectivity. *PNAS* *113*, 6556–6561.
- 549 Mattar, M.G., Cole, M.W., Thompson-Schill, S.L., and Bassett, D.S. (2015). A Functional Cartography of  
550 Cognitive Systems. *PLoS Comput Biol* *11*, e1004533.
- 551 Mearns, D.S., Donovan, J.C., Fernandes, A.M., Semmelhack, J.L., and Baier, H. (2019). Deconstructing  
552 Hunting Behavior Reveals a Tightly Coupled Stimulus-Response Loop. *Current Biology* *0*.
- 553 Miller, E.K., and Wilson, M.A. (2008). All My Circuits: Using Multiple Electrodes to Understand  
554 Functioning Neural Networks. *Neuron* *60*, 483–488.
- 555 Mitra, A., Kraft, A., Wright, P., Acland, B., Snyder, A.Z., Rosenthal, Z., Czerniewski, L., Bauer, A., Snyder,  
556 L., Culver, J., et al. (2018). Spontaneous Infra-slow Brain Activity Has Unique Spatiotemporal Dynamics  
557 and Laminar Structure. *Neuron* *98*, 297-305.e6.
- 558 Mohajerani, M.H., Chan, A.W., Mohsenzand, M., LeDue, J., Liu, R., McVea, D.A., Boyd, J.D., Wang, Y.T.,  
559 Reimers, M., and Murphy, T.H. (2013). Spontaneous cortical activity alternates between motifs defined  
560 by regional axonal projections. *Nat Neurosci* *16*, 1426–1435.
- 561 Muller, L., Chavane, F., Reynolds, J., and Sejnowski, T.J. (2018). Cortical travelling waves: mechanisms  
562 and computational principles. *Nat Rev Neurosci* *19*, 255–268.



- 563 Murphy, T.H., Boyd, J.D., Bolaños, F., Vanni, M.P., Silasi, G., Haupt, D., and LeDue, J.M. (2016). High-  
564 throughput automated home-cage mesoscopic functional imaging of mouse cortex. *Nature*  
565 *Communications* 7, 11611.
- 566 Musall, S., Kaufman, M.T., Juavinett, A.L., Gluf, S., and Churchland, A.K. (2019). Single-trial neural  
567 dynamics are dominated by richly varied movements. *Nature Neuroscience* 22, 1677–1686.
- 568 Nath, T., Mathis, A., Chen, A.C., Patel, A., Bethge, M., and Mathis, M.W. (2019). Using DeepLabCut for 3D  
569 markerless pose estimation across species and behaviors. *Nature Protocols* 14, 2152–2176.
- 570 Nicosia, V., Mangioni, G., Carchiolo, V., and Malgeri, M. (2009). Extending the definition of modularity to  
571 directed graphs with overlapping communities. *J. Stat. Mech.* 2009, P03024.
- 572 Oh, S.W., Harris, J.A., Ng, L., Winslow, B., Cain, N., Mihalas, S., Wang, Q., Lau, C., Kuan, L., Henry, A.M., et  
573 al. (2014). A mesoscale connectome of the mouse brain. *Nature* 508, 207–214.
- 574 Park, H.-J., and Friston, K. (2013). Structural and functional brain networks: from connections to  
575 cognition. *Science* 342, 1238411.
- 576 Pereira, F., Mitchell, T., and Botvinick, M. (2009). Machine learning classifiers and fMRI: a tutorial  
577 overview. *Neuroimage* 45, S199-209.
- 578 Pinto, L., Rajan, K., DePasquale, B., Thiberge, S.Y., Tank, D.W., and Brody, C.D. (2019). Task-Dependent  
579 Changes in the Large-Scale Dynamics and Necessity of Cortical Regions. *Neuron* 104, 810-824.e9.
- 580 Preti, M.G., and Vile, D.V.D. (2017). Dynamics of functional connectivity at high spatial resolution reveal  
581 long-range interactions and fine-scale organization. *Scientific Reports* 7, 12773.

- 582 Preti, M.G., Bolton, T.A., and Van De Ville, D. (2017). The dynamic functional connectome: State-of-the-  
583 art and perspectives. *Neuroimage* *160*, 41–54.
- 584 Romo, R., and de Lafuente, V. (2013). Conversion of sensory signals into perceptual decisions. *Prog*  
585 *Neurobiol* *103*, 41–75.
- 586 Schmeisser, M.J., Ey, E., Wegener, S., Bockmann, J., Stempel, a V., Kuebler, A., Janssen, A.-L., Udvardi,  
587 P.T., Shiban, E., Spilker, C., et al. (2012). Autistic-like behaviours and hyperactivity in mice lacking  
588 ProSAP1/Shank2. *Nature* *486*, 256–260.
- 589 Seabrook, T.A., Burbridge, T.J., Crair, M.C., and Huberman, A.D. (2017). Architecture, Function, and  
590 Assembly of the Mouse Visual System. *Annual Review of Neuroscience* *40*, 499–538.
- 591 Shimaoka, D., Steinmetz, N.A., Harris, K.D., and Carandini, M. (2019). The impact of bilateral ongoing  
592 activity on evoked responses in mouse cortex.
- 593 Siegel, M., Engel, A.K., and Donner, T.H. (2011). Cortical network dynamics of perceptual decision-  
594 making in the human brain. *Front Hum Neurosci* *5*, 21.
- 595 Silasi, G., Xiao, D., Vanni, M.P., Chen, A.C.N., and Murphy, T.H. (2016). Intact skull chronic windows for  
596 mesoscopic wide-field imaging in awake mice. *J Neurosci Methods* *267*, 141–149.
- 597 Stringer, C., Pachitariu, M., Steinmetz, N., Reddy, C.B., Carandini, M., and Harris, K.D. (2019a).  
598 Spontaneous behaviors drive multidimensional, brainwide activity. *Science* *364*, 255.
- 599 Stringer, C., Pachitariu, M., Steinmetz, N., Carandini, M., and Harris, K.D. (2019b). High-dimensional  
600 geometry of population responses in visual cortex. *Nature* *1*.

601 Telesford, Q.K., Lynall, M.E., Vettel, J., Miller, M.B., Grafton, S.T., and Bassett, D.S. (2016). Detection of  
602 functional brain network reconfiguration during task-driven cognitive states. *Neuroimage* *142*, 198–210.

603 Torquet, N., de Chaumont, F., Faure, P., Bourgeron, T., and Ey, E. (2016). mouseTube – a database to  
604 collaboratively unravel mouse ultrasonic communication. *F1000Research* *5*, 2332.

605 Van Segbroeck, M., Knoll, A.T., Levitt, P., and Narayanan, S. (2017). MUPET-Mouse Ultrasonic Profile  
606 ExTraction: A Signal Processing Tool for Rapid and Unsupervised Analysis of Ultrasonic Vocalizations.  
607 *Neuron* *94*, 465-485.e5.

608 Vanni, M.P., and Murphy, T.H. (2014). Mesoscale Transcranial Spontaneous Activity Mapping in GCaMP3  
609 Transgenic Mice Reveals Extensive Reciprocal Connections between Areas of Somatomotor Cortex. *J*  
610 *Neurosci* *34*, 15931–15946.

611 Vanni, M.P., Chan, A.W., Balbi, M., Silasi, G., and Murphy, T.H. (2017). Mesoscale Mapping of Mouse  
612 Cortex Reveals Frequency-Dependent Cycling between Distinct Macroscale Functional Modules. *J*  
613 *Neurosci* *37*, 7513–7533.

614 Vidaurre, D., Smith, S.M., and Woolrich, M.W. (2017). Brain network dynamics are hierarchically  
615 organized in time. *Proc Natl Acad Sci U S A* *114*, 12827–12832.

616 Wiltchko, A.B., Johnson, M.J., Iurilli, G., Peterson, R.E., Katon, J.M., Pashkovski, S.L., Abaira, V.E.,  
617 Adams, R.P., and Datta, S.R. (2015). Mapping Sub-Second Structure in Mouse Behavior. *Neuron* *88*,  
618 1121–1135.

619 Yeo, B.T., Krienen, F.M., Sepulcre, J., Sabuncu, M.R., Lashkari, D., Hollinshead, M., Roffman, J.L., Smoller,  
620 J.W., Zollei, L., Polimeni, J.R., et al. (2011). The organization of the human cerebral cortex estimated by  
621 intrinsic functional connectivity. *J Neurophysiol* *106*, 1125–1165.

622 Zanos, T.P., Mineault, P.J., Nasiotis, K.T., Guitton, D., and Pack, C.C. (2015). A sensorimotor role for  
623 traveling waves in primate visual cortex. *Neuron* 85, 615–627.

624

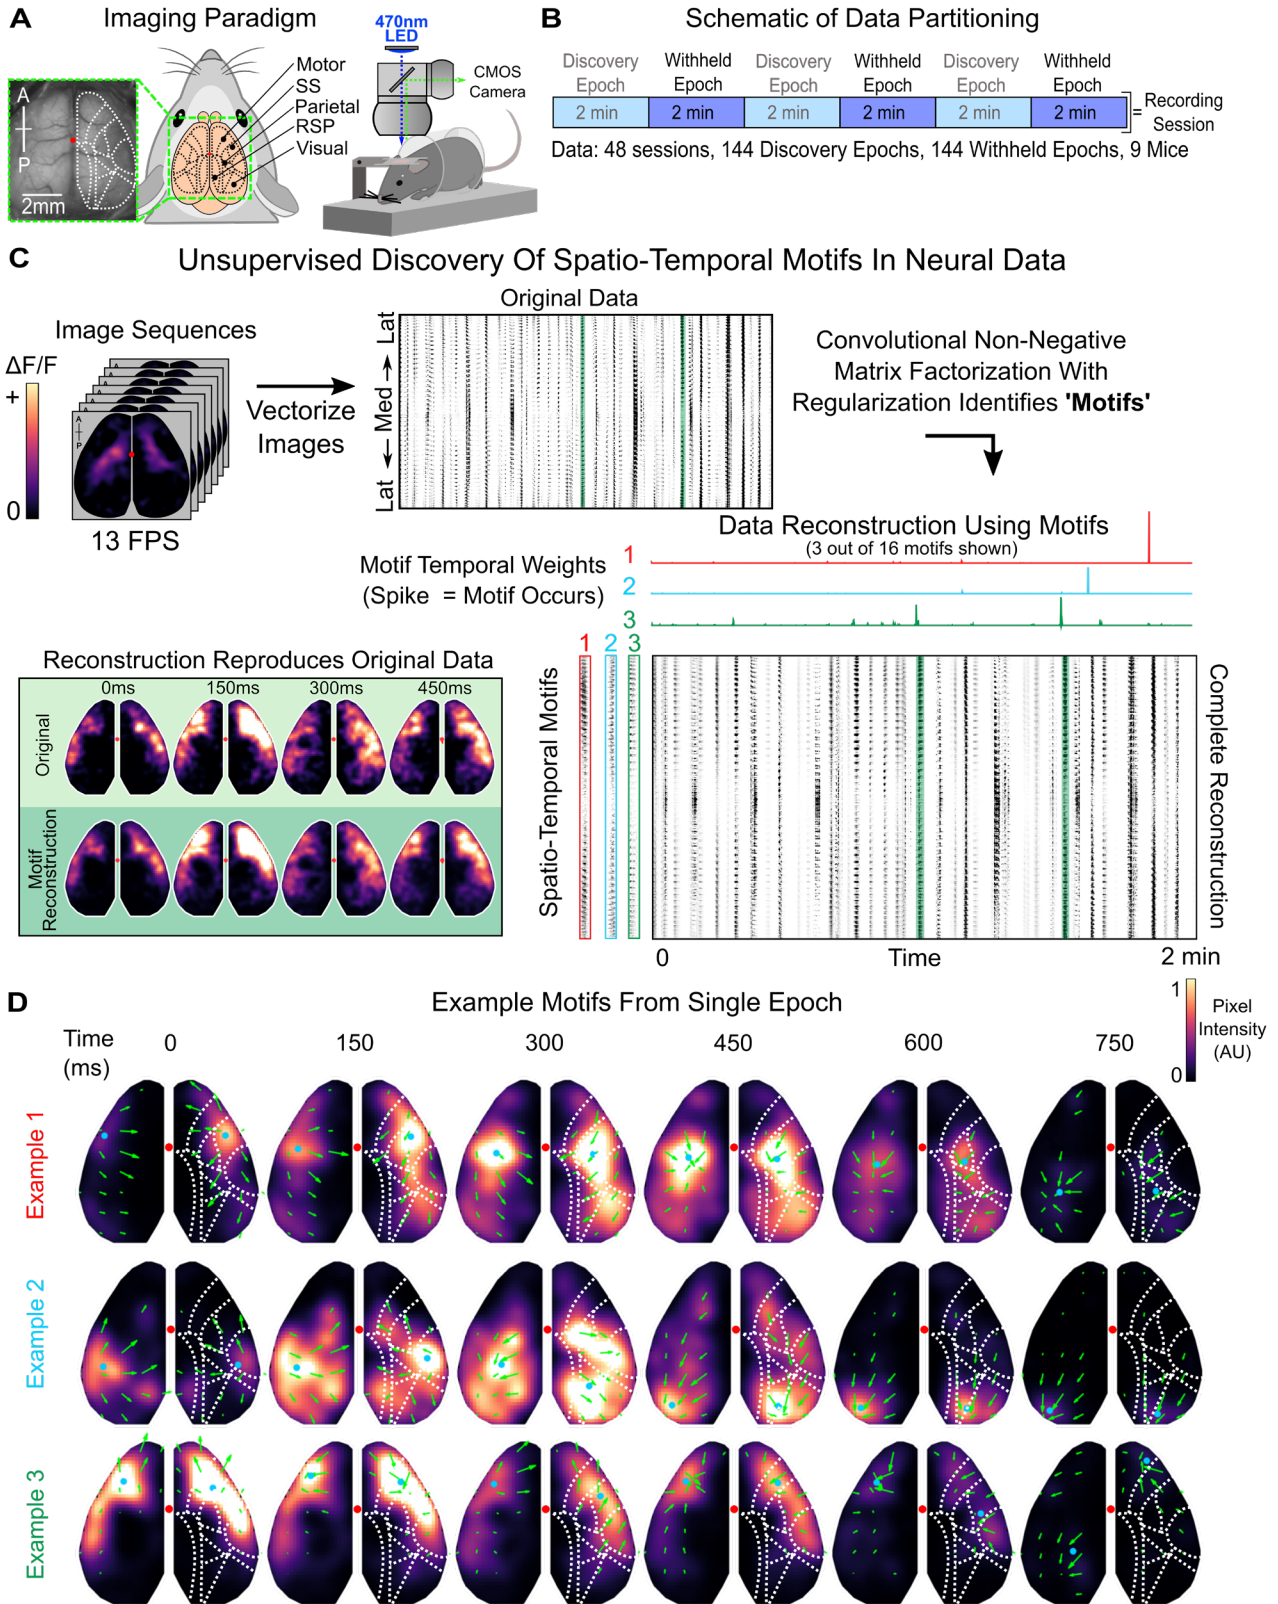

626 **Figure 1. Discovery of spatio-temporal patterns in cortical activity of awake, head-fixed**  
627 **mice.**

628 **(A)** Schematic of imaging paradigm. Mice expressing GCaMP6f in cortical pyramidal neurons  
629 underwent a translucent skull prep to allow mesoscale imaging of neural activity across the  
630 majority of dorsal cortex. Red dot denotes bregma. Cortical parcellation follows Allen Brain Atlas.  
631 General anatomical parcels are labeled. Motor, motor cortex; SS, somatosensory cortex; Parietal,  
632 parietal cortex; RSP, retrosplenial cortex; Visual: visual cortex (See Fig. 1 supplement 1 for  
633 complete parcellation of 24 regions; 12 per hemisphere).

634 **(B)** Schematic of data partitioning. 9 mice were imaged for 12 minutes a day for 5-6 consecutive  
635 days. Recording sessions (N=48) were divided into 2-minute epochs (N=144). Alternating epochs  
636 were used for discovering spatio-temporal motifs in neural activity or were withheld for testing  
637 generalization of motifs.

638 **(C)** Schematic of unsupervised discovery of spatio-temporal motifs from a single epoch.  
639 Mesoscale calcium imaging captured patterns of neural activity, measured by change in  
640 fluorescence ( $\Delta F/F$ ), across the dorsal cortex (top-left). Movies were vectorized (top-middle,  
641 black=activity) and then decomposed into dynamic, spatio-temporal motifs (bottom-right; 3  
642 example motifs shown along left, temporal weightings along top). Convolving motifs with temporal  
643 weightings reconstructed the original movie (bottom-left; snapshot of data is highlighted in green  
644 throughout, corresponding to activity in motif 3, which is shown in image format in bottom row of  
645 **D**). Note: only 3 out of 16 example motifs and their corresponding temporal weightings are shown;  
646 data reconstruction in bottom right used all 16 motifs.

647 **(D)** Timecourses of the 3 example motifs in panel **C** showing spatio-temporal patterns of neural  
648 activity across dorsal cortex. Arrows indicate direction of flow of activity across subsequent  
649 timepoints (see Methods for details). Blue dot denotes center of mass of the most active pixels in

650 each hemisphere ( $\geq 95\%$  intensity). Red dot denotes bregma. Dotted white lines outline  
651 anatomical parcels as in **A**. Only every other timepoint is shown. For visualization, motifs were  
652 filtered with 3D gaussian (across space and time), and intensity scale is normalized for each motif.  
653 Intensity value is arbitrary as responses are convolved with independently scaled temporal  
654 weightings to reconstruct the normalized  $\Delta F/F$  fluorescence trace (see Methods for details).

655

656

657

658

659

660

661

662

663

664

665

666

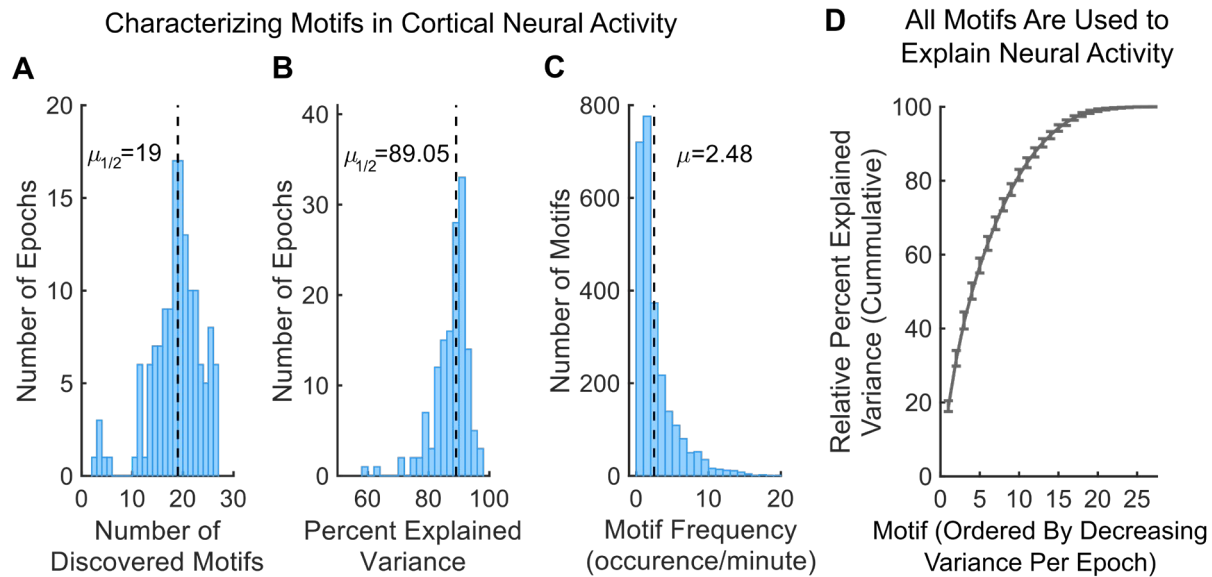

667

668 **Figure 2. Motifs capture majority of variance in neural activity**

669 **(A)** Distribution of number of discovered motifs per discovery epoch (N=144). Dotted line indicates  
670 median. 2622 motifs were discovered in total.

671 **(B)** Distribution of the total percent of variance in neural activity explained by motifs per discovery  
672 epoch. Dotted line indicates median.

673 **(C)** Distribution of how often motifs occurred during discovery epochs. A motif was considered  
674 active when its temporal weighting was 1 standard deviation above its mean (e.g. transients in  
675 Fig. 1C in occurrences per minute; see Methods for details). Dotted line indicates mean.

676 **(D)** Cumulative sum of relative percent explained variance (PEV) of each motif in withheld epochs.  
677 Relative PEV was calculated as the PEV of each motif divided by the sum of all motif PEVs in an  
678 epoch. For each epoch, motifs are ordered by their relative PEV (i.e. the first motif is the most  
679 common motif, which is not necessarily the same motif for all epochs). Line and error bars indicate  
680 mean and 95% CI, respectively.

681 All p-values estimated with Wilcoxon Signed-Rank tests.



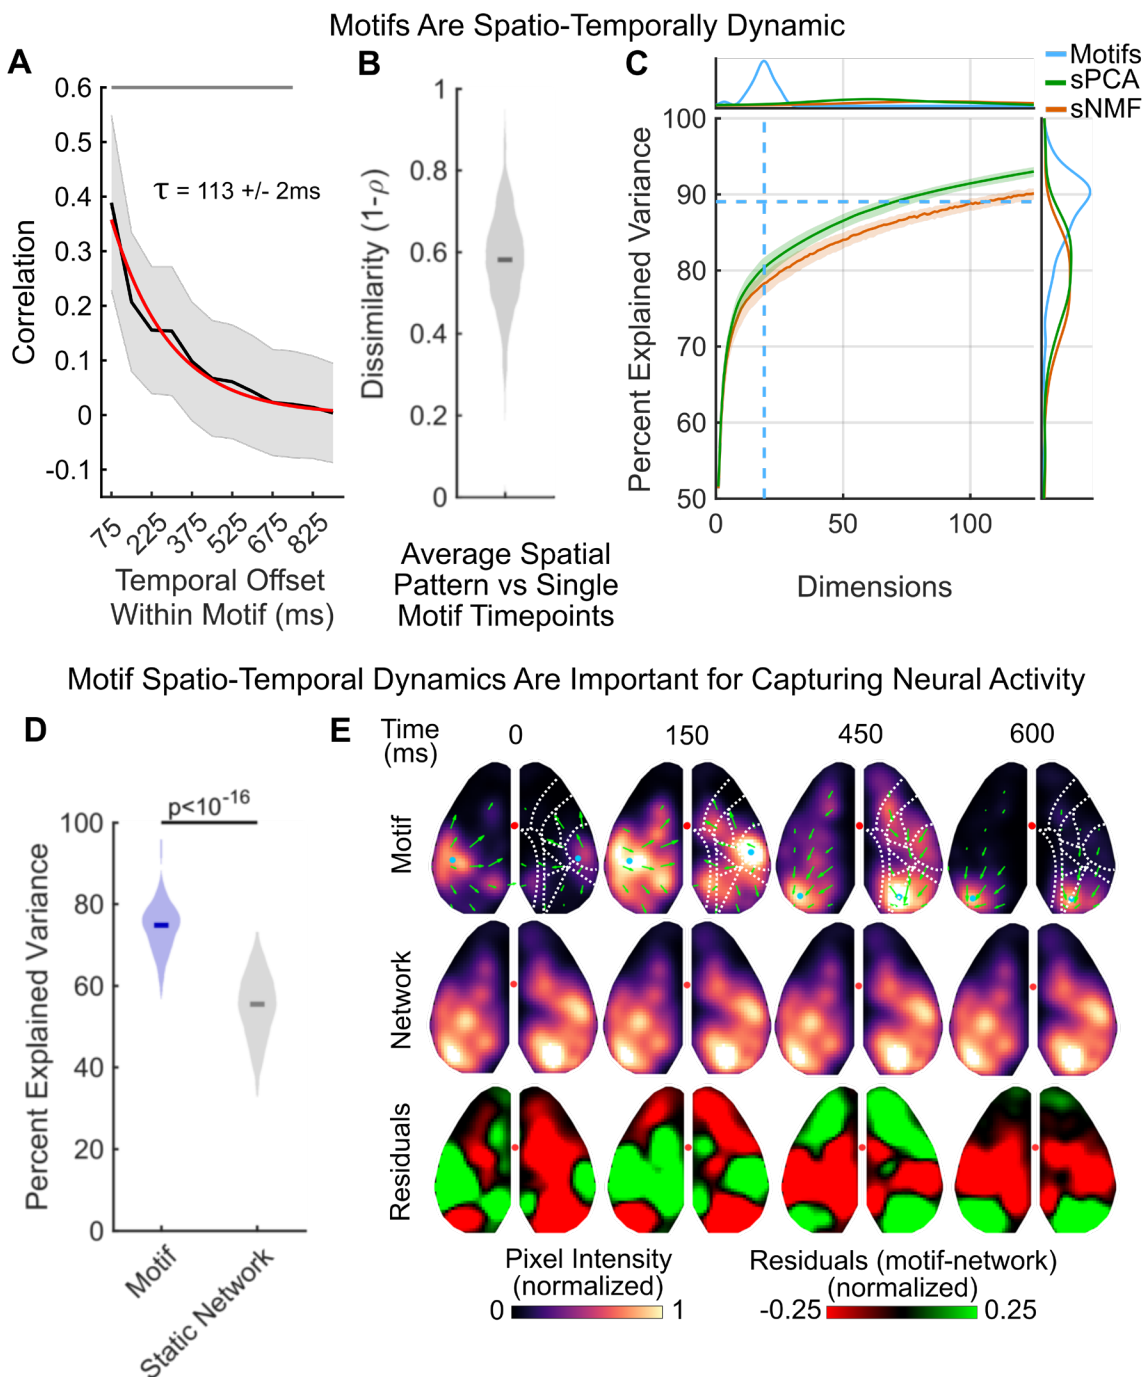

682

683 **Figure 3. Motifs capture the flow of neural activity across the cortex**

684 **(A)** Cross-temporal autocorrelation of motifs (N=2622). Average spatial correlation of activity (y-  
 685 axis) was calculated for different temporal offsets (x-axis) within a motif. For example, an offset  
 686 of 75ms indicates the correlation between timepoint N and timepoints N-1 and N+1 (given

687 sampling frequency of 13.33 Hz). Black line and gray shading denote mean and standard  
688 deviation, respectively, across all motifs. Red line shows exponential fit to autocorrelation decay.  
689 Mean half-life of autocorrelation decay ( $\tau$ ) across all motifs was 113ms +/- 2ms SEM.

690 **(B)** Average dissimilarity between each timepoint of a dynamic motif and the mean spatial activity  
691 of that motif; averaged across frames of the motifs. Full distribution shown, depicts average  
692 dissimilarity per motif (N=2622 motifs). Dark line indicates median.

693 **(C)** Comparison of reconstruction of neural data by CNMF motifs (blue), spatial principal  
694 components analysis (sPCA, green) and spatial non-negative matrix factorization (sNMF,  
695 orange). Central plot shows percent of variance in neural activity explained (y-axis) as a function  
696 of number of dimensions included (x-axis). Lines show median variance explained, shaded  
697 regions show 95% confidence interval. Dashed light blue lines show median number of motifs  
698 discovered (vertical) and the median percent explained variance (horizontal) captured by CNMF  
699 motifs across discovery epochs (N=144). **(top)** Plot shows the probability density function (PDF)  
700 of number of motifs discovered per discovery epoch (blue), as well as the PDF of the minimum  
701 number of dimensions needed to capture the same amount of variance using sPCA (orange)  
702 and sNMF (green). **(right)** PDF of percent explained variance by motif reconstructions (blue)  
703 across epochs, as well as the PDF of percent of variance explained by sPCA (orange) and  
704 sNMF (green) when the number of dimensions is restricted to match the number of discovered  
705 motifs in each epoch. For visualization, x-axis is cropped to 125 dimensions.

706 **(D)** Percent of variance in neural activity explained by dynamic motifs (blue) and static networks  
707 (grey), defined as the average activity across the motif. Both static networks and motifs are fit to  
708 the data in the same manner (see Methods for details). Full distribution shown; dark lines indicate  
709 median. Analyses performed on withheld epochs (N=144).

710 **(E)** An example motif (top row; example motif 2 from Fig. 1D) and its corresponding static  
711 network (middle row). Bottom row shows normalized residuals between dynamic motif and static  
712 network. For calculation of residuals, motif and networks were scaled to the same mean pixel  
713 value per timepoint. Display follows Figure 1D.

714 All p-values estimated with Wilcoxon Signed-Rank tests.

715

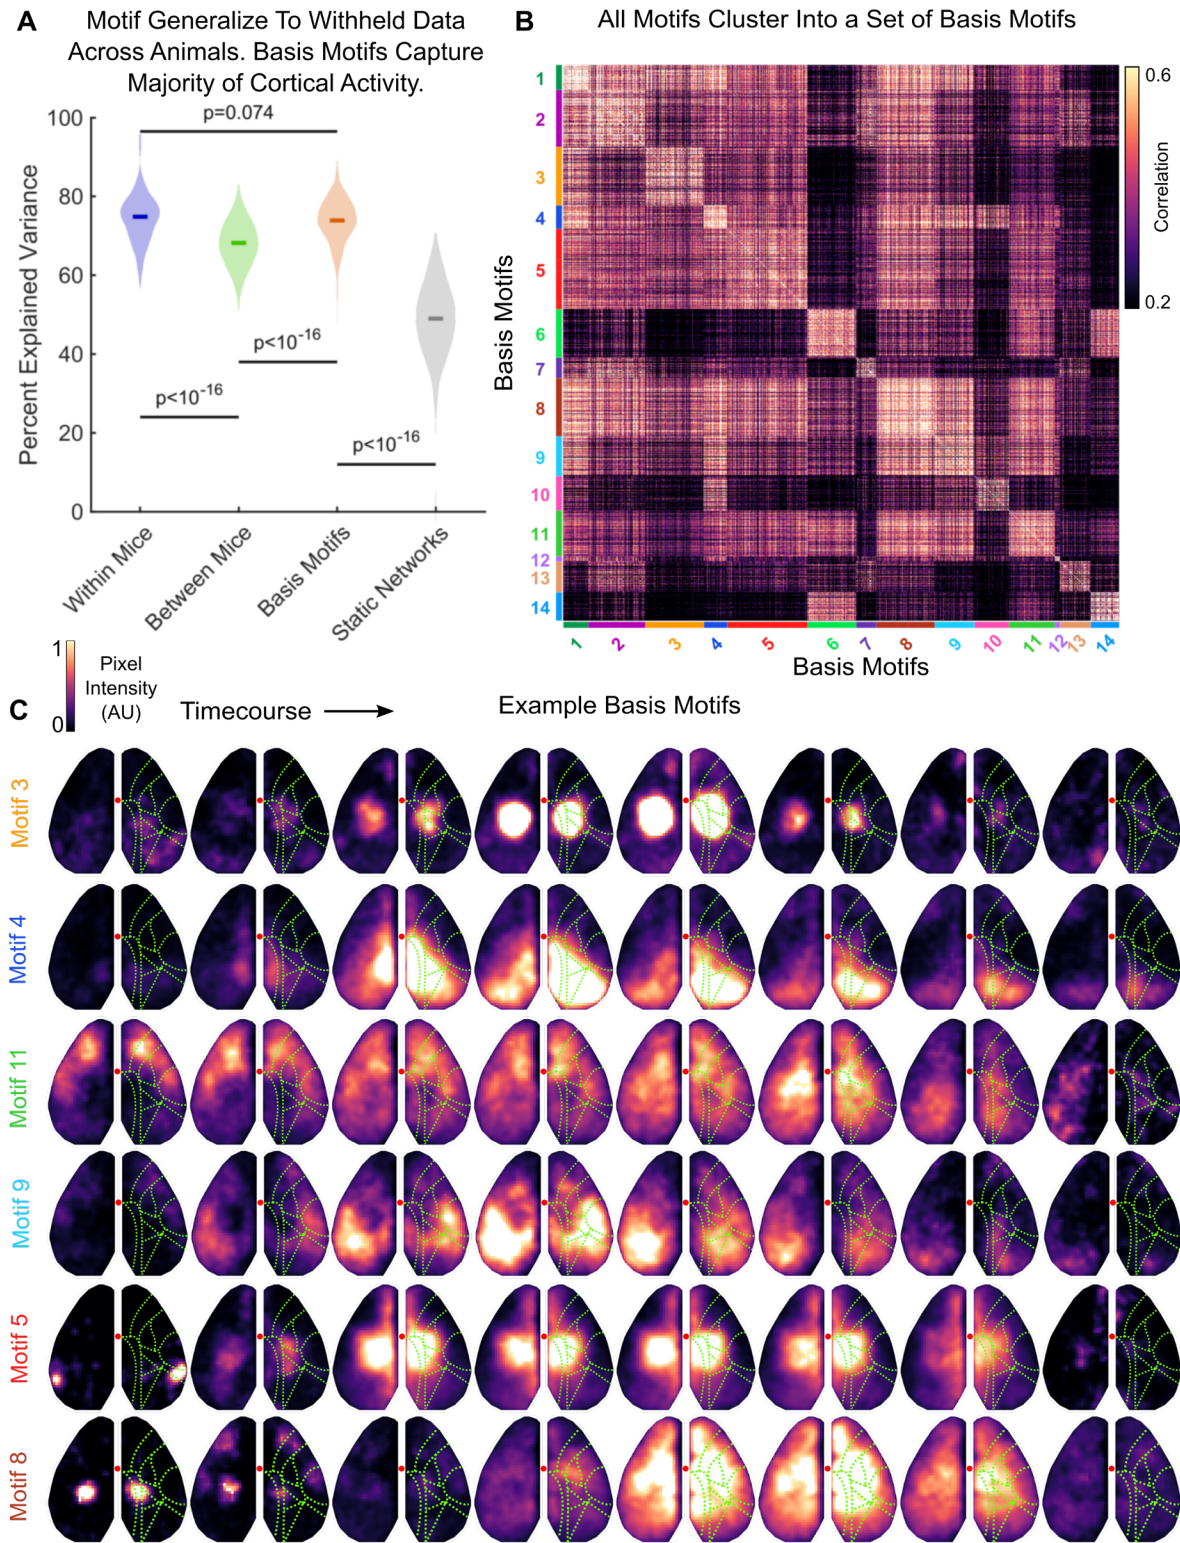

716

717 **Figure 4. Motifs cluster into a low-dimensional set of basis motifs.**

718 **(A)** Comparison of the percent of variance in neural activity explained by motifs from the same  
719 mouse (within; purple), by motifs from other mice (between; green), by basis motifs (orange), and  
720 by static network versions of basis motifs (gray). Static networks for each basis motifs were  
721 derived as in Figure 3 (see Methods for details). All show fit to withheld data (N=144). Full  
722 distribution shown; dark lines indicate median. Horizontal lines indicate pairwise comparisons. All  
723 p-values estimated with Mann-Whitney U-test.

724 **(B)** Pairwise peak cross-correlation between all 2622 discovered motifs. Motifs are grouped by  
725 their membership in basis motif clusters. Basis motif identity is indicated with color code along  
726 axes. Group numbering (and thus the sorting of the correlation matrix) is determined by relative  
727 variance explained by each basis motif (see Fig. 4 supplement 1A).

728 **(C)** Representative timepoints from example basis motifs. Display follows Fig. 1D, except without  
729 direction of flow arrows.

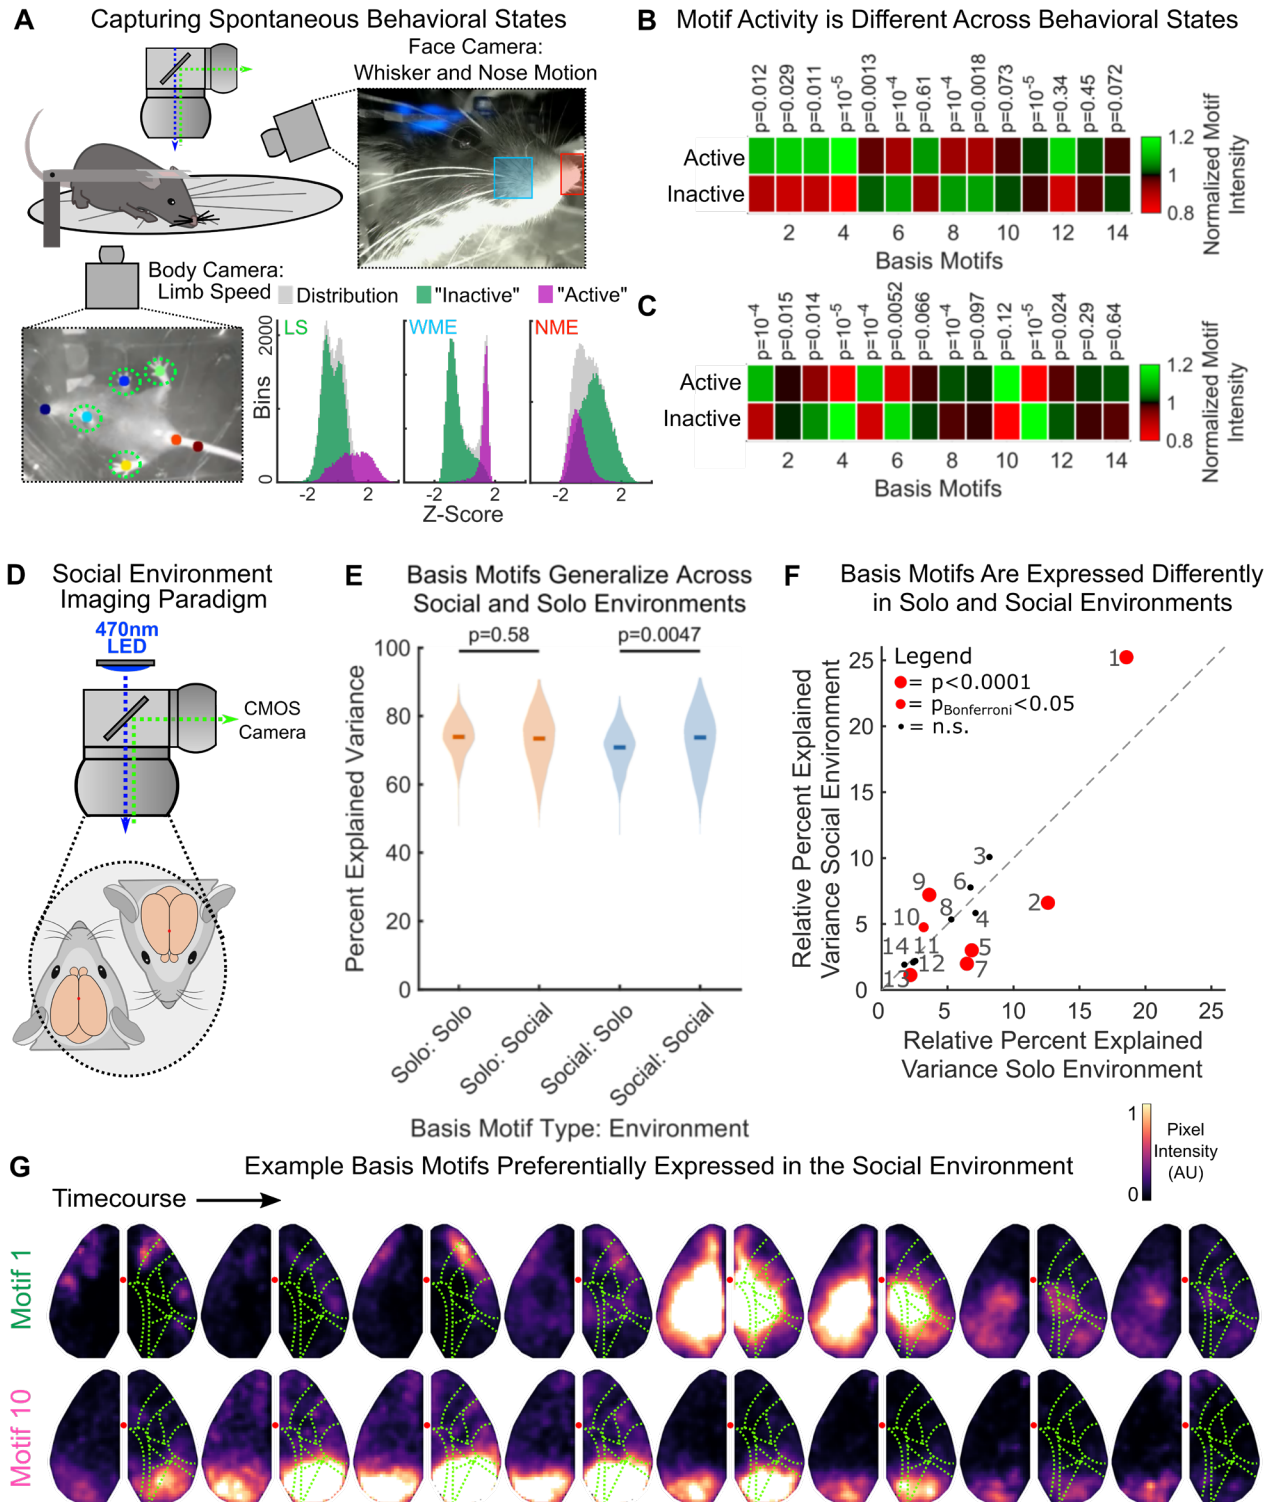

730

731 **Figure 5. Basis motifs generalize to new animals, across behavioral states, and to social**

732 **environments.**

733 **(A)** Schematic of simultaneous mesoscale imaging and video capture of spontaneous behavior  
734 of head-fixed mice on a transparent treadmill. Two new mice, not from the original cohort were  
735 used. Blue and red squares indicate area used to measure whisker pad motion energy (WME)  
736 and nose motion energy (NME), respectively. Colored dots indicate tracked position of the  
737 forelimbs, nose, and tail. These were used to estimate limb speed (LS). Distribution of behavioral  
738 variables are shown in three histograms along bottom. Gaussian mixture models fit to the  
739 distributions of LS, WME, and NME simultaneously. Two states were discovered: an “active” and  
740 “inactive” state (inset; purple and green respectively, see Methods for details).

741 **(B-C)** Motif activity evaluated across different behavioral states in mouse 1 **(B)** and mouse 2 **(C)**.  
742 Heatmaps show the mean activity of each motif (x-axis) during a behavioral state (y-axis)  
743 normalized to the mean activity for that motif across all states. Motif activity was estimated as the  
744 mean pixel value of a motif reconstruction over time (see Methods for details). P-values compare  
745 motif activity across the two behavioral states. Note: behavioral states across mice are not directly  
746 comparable since “active” and “inactive” states reflect a diversity of possible behaviors, as  
747 confirmed by manual inspection of videos.

748 **(D)** Schematic of social environment imaging paradigm.

749 **(E)** Comparison of the percent of variance in neural activity that could be explained when animal  
750 was alone (at rest, ‘solo’) or when paired with another animal (‘social’). Basis motifs were  
751 estimated in each setting and then fit to withheld data in both settings (as in Figure 4C; N=144  
752 and N=123 withheld epochs for solo and social settings, respectively). Labels indicate  
753 identification environment: fitting environment (e.g. ‘Solo: Social’ indicates basis motifs from solo  
754 environment fit to withheld social data). Full distribution shown; dark lines indicate median.

755 **(F)**. Scatter plot of the relative PEV for each basis motif in the solo environment (x-axis; N=144  
756 epochs) versus the social environment (y-axis; N=123 epochs). Motif labels are indicated with

757 numbers, red markers indicate significant differences in expression rate between environments.

758 Identity line shown along diagonal.

759 **(G)** Example basis motifs preferentially expressed in the social environment. Display and motif

760 labels follow Figure 4.

761 All p-values estimated with Mann-Whitney U-test.



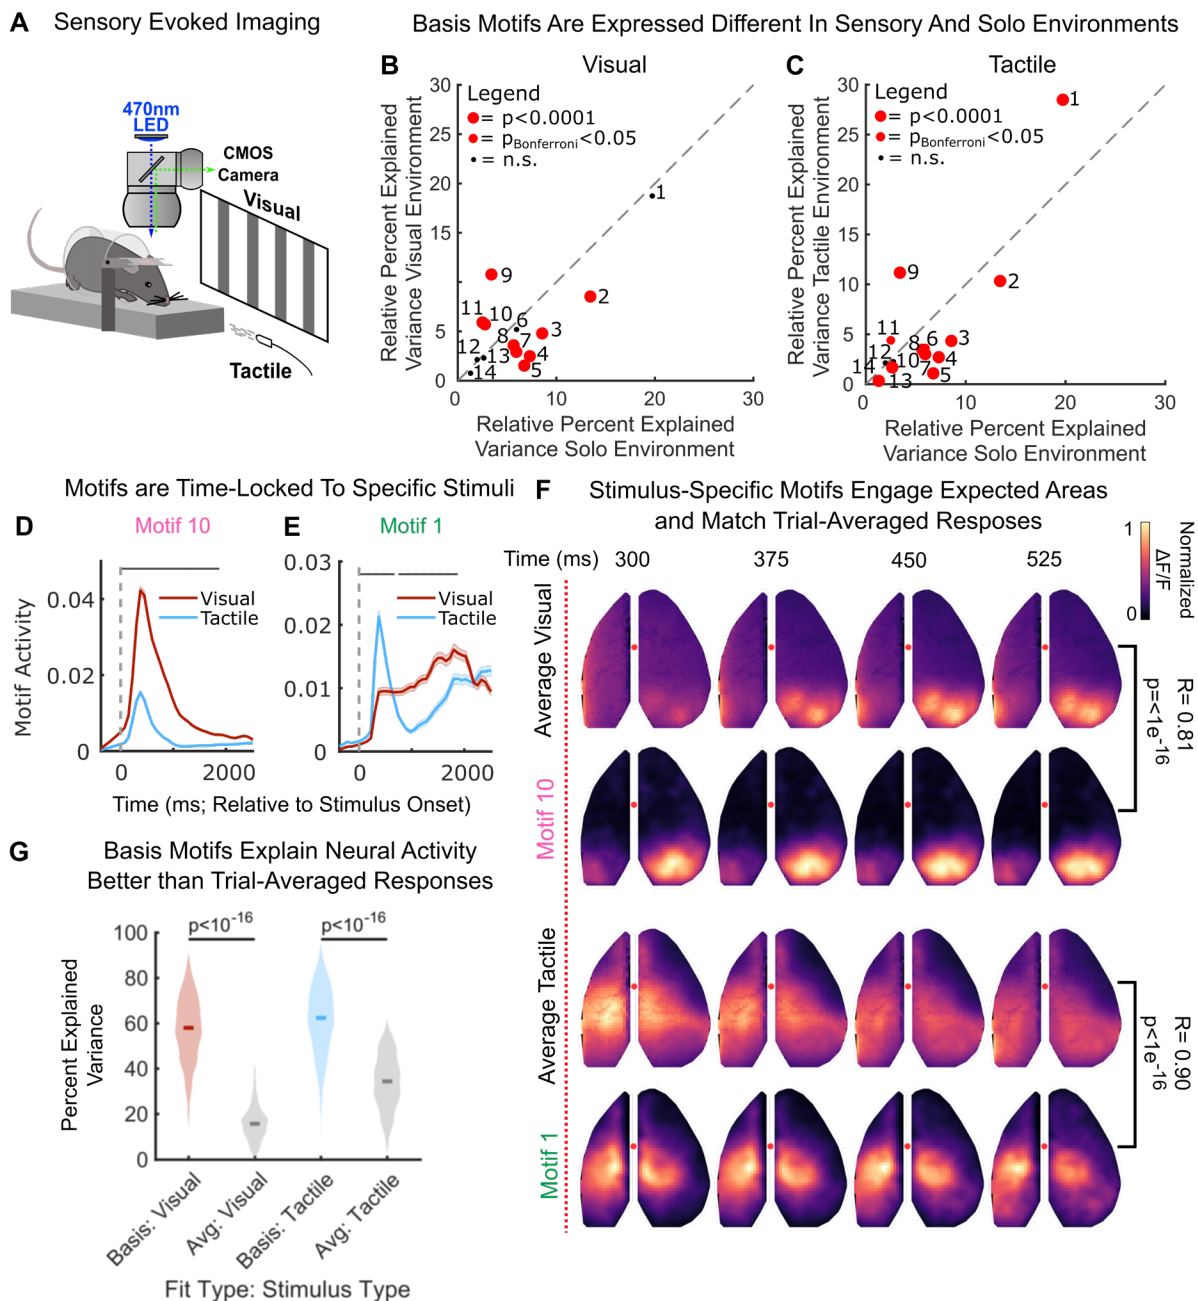

762

763 **Figure 6. Specific basis motifs reflect processing of specific stimulus modalities**

764 **(A)** Schematic of sensory stimulation paradigm. All stimuli were delivered on animals' left side.

765 **(B-C)** Scatter plot of the relative PEV for each basis motif in the solo environment (x-axis; N=144)

766 versus the **(B)** visual or **(C)** tactile environment (y-axis; N=1109 and N=1110 visual and tactile

767 samples, respectively). Display follows Figure 5F, showing activation in solo environment at rest  
768 (x-axis) versus activation in response to sensory stimuli. Significance computed with Mann-  
769 Whitney U-test.

770 **(D-E)** Timecourse of **(D)** motif 10 and **(E)** motif 1 activity relative to stimulus onset (vertical  
771 dotted line). Lines and shaded regions indicate mean +/- SEM motif activity in response to  
772 visual (red; N=1109) and tactile (blue; N=1110) stimulation. Motif activity calculated as the mean  
773 pixel value of a motif reconstruction over time (see Methods for details). Horizontal grey bar  
774 indicates significant difference in motif activity between visual and tactile stimuli ( $p_{\text{Bonferroni}} < 0.05$ ,  
775 two-sample t-test; see Methods for details).

776 **(F)** Comparison of the trial-averaged stimulus-evoked response and the stimulus-evoked  
777 response of the selective basis motifs in **B-C**. First two rows show responses for visual stimuli;  
778 third and fourth rows for tactile stimuli. Correlation between average response and basis motif is  
779 indicated along right side (pixelwise correlation, Pearson's  $\rho$ ). As amplitude of response is  
780 arbitrary, pixel intensities were normalized from 0-to-1 before correlation.

781 **(G)** Basis motifs explain more of the variance in neural activity than the average stimulus  
782 response. Distributions show the percent of variance in neural activity during the 5 s after stimulus  
783 explained by basis motifs (colors) or average responses (gray). Full distribution shown; dark lines  
784 indicate median. Significance computed with Wilcoxon Signed-Rank test.

785

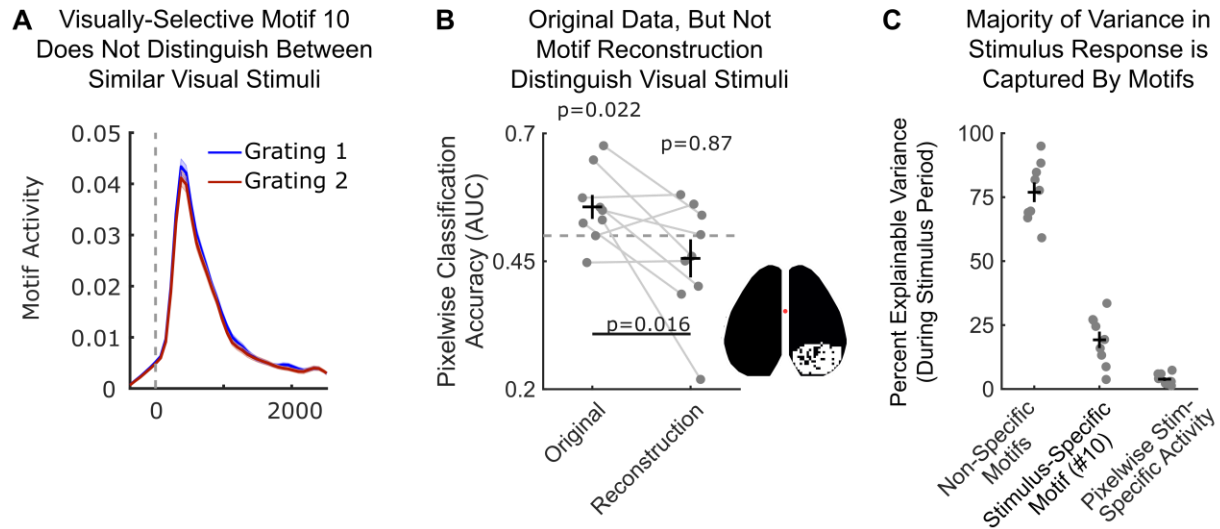

786

787 **Figure 7. Basis motif 10 reflects general visual stimulus processing.**

788 **(A)** Timecourse of motif 10 intensity relative to onset (vertical dotted line) of visual grating 1 (blue;  
789 N=554) or visual grating 2 (red; N=555). Display follows Figure 6D-E. No significant differences  
790 were observed between stimuli at any timepoint.  $p > 0.11$  for all timepoints; two-sample t-test.

791 **(B)** Visual stimuli can be decoded from neural response but not motif response. Classification  
792 was done using a support vector machine (SVM) classifier (see Methods for details) and accuracy  
793 is shown for withheld validation trials. Markers indicate classifier performance (measured with  
794 AUC) for each animal (N=9). Classifiers were trained on either raw pixel values (left column) or  
795 reconstructed motif response (right column). Inset shows pixels used for classification (see  
796 Methods for details). Dotted line denotes chance (AUC=0.5). Significance computed with one-  
797 sample t-test.

798 **(C)** Percent explainable variance in neural activity in response to visual stimuli captured by motifs  
799 and stimulus-specific residuals. Stimulus specific residuals are the trial-averaged residuals of  
800 motif reconstructions to each visual stimulus type. Data points correspond to mice (N=9). Black  
801 bars denote mean (horizontal) and SEM (vertical).

802 **Material and Methods**

803 **Key Resources Table**

| REAGENT or RESOURCE                                                 | SOURCE                                                                              | IDENTIFIER |
|---------------------------------------------------------------------|-------------------------------------------------------------------------------------|------------|
| Experimental Models: Organisms/Strains                              |                                                                                     |            |
| Mouse: Thy1-GCaMP6f:<br><i>C57BL/6J-Tg(Thy1-GCaMP6f)GP5.3Dkim/J</i> | The Jackson Laboratory                                                              | #028280    |
| Software and Algorithms                                             |                                                                                     |            |
| MATLAB 2017a-2018b                                                  | Mathworks                                                                           | N/A        |
| seqNMF MATLAB Toolbox                                               | Mackevicius et al., 2019                                                            | N/A        |
| MUPET MATLAB Toolbox                                                | Van Segbroeck et al., 2017                                                          | N/A        |
| OFAMM MATLAB Toolbox                                                | Afrashteh et al., 2017                                                              | N/A        |
| Psychtoolbox-3 MATLAB Toolbox                                       | <a href="http://psychtoolbox.org/">http://psychtoolbox.org/</a><br>(Brainard, 1997) | N/A        |
| Python version 3.6.4                                                | Python Software Foundation                                                          | N/A        |
| DeepLabCut Python Library                                           | Mathis et al., 2018                                                                 | N/A        |
| Signal Processing and Analysis code for Widefield Imaging data      | This paper                                                                          | N/A        |

804

805 **Lead Contact and Material Availability**

806 Further information and request for resources and reagents should be addressed to Lead Contact,  
807 Timothy J. Buschman ([tbuschma@princeton.edu](mailto:tbuschma@princeton.edu))

808 **Data and Software Availability**

809 Preprocessed data is available on Dryad data repository as image stacks (saved in Matlab file  
810 format; DOI: 10.5061/dryad.kkwh70s1v; url: [https://datadryad.org/stash/share/-q39l6jEbN--](https://datadryad.org/stash/share/-q39l6jEbN--voeSe2-5Y3Z1pfbeYEFLO-Kf_f-cjpE)  
811 [voeSe2-5Y3Z1pfbeYEFLO-Kf\\_f-cjpE](https://datadryad.org/stash/share/-q39l6jEbN--voeSe2-5Y3Z1pfbeYEFLO-Kf_f-cjpE)). The data has been preprocessed as described below  
812 (spatially binned, masked, filtered, and then thresholded). Due to file size constraints, the full  
813 raw data is not available on the Dryad repository but is available upon request. Example data  
814 and figure generation code will be available on GitHub (<https://github.com/buschman-lab>) upon  
815 acceptance.

816 **Experimental Model**

817 All experiments and procedures were carried out in accordance with the standards of the Animal  
818 Care and Use Committee (IACUC) of Princeton University and the National Institutes of Health.  
819 All mice were ~6-8 weeks of age at the start of experiments. Mice (N=11) were group housed  
820 prior to surgery and single housed post-surgery on a reverse 12-hr light cycle. All experiments  
821 were performed during the dark period, typically between 12:00 and 18:00. Animals received  
822 standard rodent diets and water *ad libitum*. Both female (N=5) and male (N=6) mice were used.  
823 All mice were C57BL/6J-Tg(Thy1-GCaMP6f)GP5.3Dkim/J (The Jackson Laboratory; Dana et al.,  
824 2014). 9 mice were used for solo (rest) and sensory environment widefield imaging experiments.  
825 These mice were control animals from a larger study. In that context, these animals were the  
826 offspring of female mice that received a single intraperitoneal injection (0.6-0.66mL, depending  
827 on animal weight) of sterile saline while pregnant. A subset of these mice (N=7) were used for  
828 social imaging experiments. Separate mice (N=2) were used for spontaneous behavioral state  
829 and hemodynamic correction experiments (these mice did not receive *in utero* exposure to saline).

### 830 **Surgical Procedures**

831 Surgical procedures closely followed Guo et al. (2014). Mice were anesthetized with isoflurane  
832 (induction ~2.5%; maintenance ~1%). Buprenorphine (0.1mg/kg), Meloxicam (1mg/kg), and  
833 sterile saline (0.01mL/g) were administered at the start of surgery. Anesthesia depth was  
834 confirmed by toe pinch. Hair was removed from the dorsal scalp (Wahl, Series 8655 Hair  
835 Trimmer), the area was disinfected with 3 repeat applications of betadine and 70% isopropanol,  
836 and the skin removed. Periosteum was removed and the skull was dried. A thin, even layer of  
837 clear dental acrylic was applied to the exposed bone and let dry for ~15 minutes (C&B Metabond  
838 Quick Cement System). Acrylic was polished until even and translucent using a rotary tool  
839 (Dremel, Series 7700) with rubber acrylic polishing tip (Shofu, part #0321). A custom titanium  
840 headplate with a 11mm trapezoidal window was cemented to the skull with dental acrylic (C&B  
841 Metabond). After the cement was fixed (~15 minutes), a thin layer of clear nail polish (Electron

842 Microscopy Sciences, part #72180) was applied to the translucent skull window and allowed to  
843 dry (~10 minutes). A custom acrylic cover screwed to the headplate protected the translucent  
844 skull after surgery and between imaging sessions. After surgery, mice were placed in a clean  
845 home cage to recover. Mice were administered Meloxicam (1mg/kg) 24 hours post-surgery and  
846 single housed for the duration of the study.

## 847 **Widefield Imaging**

848 Imaging took place in a quiet, dark, dedicated imaging room. For all experiments except  
849 spontaneous behavioral monitoring (detailed below), mice were head-fixed in a 1.5 inch diameter  
850 x 4 inch long polycarbonate tube (Fig. 1A) and placed under a custom-built fluorescence  
851 macroscope consisting of back-to-back 50 mm objective lens (Leica, 0.63x and 1x magnification),  
852 separated by a 495nm dichroic mirror (Semrock Inc, FF495-Di03-50x70). Excitation light (470nm,  
853 0.4mW/mm<sup>2</sup>) was delivered through the objective lens from an LED (Luxeon, 470nm Rebel LED,  
854 part #SP-03-B4) with a 470/22 clean-up bandpass filter (Semrock, FF01-470/22-25).  
855 Fluorescence was captured in 75ms exposures (FPS = 13.3Hz) by an Optimos CMOS Camera  
856 (Photometrics). Prior to imaging, the macroscope was focused ~500um below the dorsal cranium,  
857 below surface blood vessels. Fluorescence activity was captured at 980x540 resolution  
858 (~34um/pixel) when the animal was imaged alone.

859 Images were captured using Micro-Manager software (version 1.4, Edelstein et al., 2014) on a  
860 dedicated imaging computer (Microsoft, Windows 7). Image capture was triggered by an analog  
861 voltage signal from a separate timing acquisition computer. Custom MATLAB (Mathworks) code  
862 controlled stimulus delivery, recorded gross animal movement via a piezo sensor (SparkFun, part  
863 #09197) attached to the animal holding tube, and captured camera exposure timing through a  
864 DAQ card (National Instruments, PCIe-6323 X Series, part #7481045-01). Timing of all camera  
865 exposures, triggers, behavioral measures, and stimulus delivery were captured for post-hoc

866 timing validation. No frames were dropped across any imaging experiments. A camera allowed  
867 remote animal monitoring for signs of distress.

868 For recordings of spontaneous cortical activity, mice were head-fixed in the imaging rig and  
869 habituated for 5 minutes. After habituation, cortical activity was recorded for 12 consecutive  
870 minutes and stored as 3, 4-minute stacks of TIFF images. Qualitative real-time assessment of  
871 behavioral videos and post-hoc analysis of activity (captured by piezo sensor) revealed minimal  
872 episodes of extensive motor activity (e.g. struggling) during imaging. As our goal is to capture all  
873 behavioral states, we did not exclude these moments from our analysis. Instead, motifs captured  
874 these events alongside other cortical events.

#### 875 **Widefield Imaging: Spontaneous Behavioral State Monitoring**

876 Widefield imaging was performed as above with minor modifications. Mice were head-fixed on a  
877 custom transparent acrylic treadmill and illuminated with infrared light (Univivi 850nm IR  
878 Illuminator). During imaging, behavioral measures were captured using two cameras: a PS3 EYE  
879 webcam (640x480 pixel resolution) focused on the animal's whole body and a GearHead webcam  
880 (320x240 pixel resolution) focused on the animal's face. Custom python (v3.6.4) scripts  
881 synchronized the frame exposure of the behavioral cameras at 60Hz.

#### 882 **Widefield Imaging: Paired Social Environment**

883 The microscope objectives from the above widefield imaging paradigm were replaced with 0.63x  
884 and 1.6x magnification back-to-back objectives, permitting an ~30x20mm field of view (lens order:  
885 mouse, 0.63x, 1.6x, CMOS camera). Images were acquired at 1960 x 1080 resolution  
886 (~34um/pixel). Animals were precisely positioned to be the same distance from the objective.  
887 Mice faced one another, approximately eye-to-eye in the anterior-posterior axis. Their snouts  
888 were separated along the medial-lateral axis by a 5-7 mm gap; close enough to permit whisking  
889 and social contact but prevent adverse physical interactions. A 1mm plexiglass divider at snout

890 level ensured no paw/limb contact. Mice were positioned in individual plexiglass tubes. Pairs were  
891 imaged together for 12 consecutive minutes, once each recording day. Some pairings included  
892 mice outside this study cohort. 76 recordings from the experimental cohort were collected. After  
893 each recording, the imaging apparatus was thoroughly cleaned with ethanol and dried before  
894 imaging of the next pair (removing olfactory cues).

895 Animal pairs were provided with sensory stimuli consisting of playback of pre-recorded,  
896 naturalistic ultrasonic vocalizations (USVs) between adult mice, synthetic USVs, or 'background'  
897 noise. Naturalistic USV stimuli were obtained from the mouseTube database (Torquet et al.,  
898 2016). In particular, we used four recordings of 3 min interactions between male and estrus female  
899 wildtype C57BL/6J mice (files S2-4-4, S2-4-105, S2-4-123, S2-4-138). Details on the methods  
900 used to record these interactions are described in the original study by Schmeisser et al. (2012).  
901 To produce more salient stimuli, we reduced these 3 min recordings into 1 min recordings by  
902 using Praat software (version 6.0.23) to shorten the silent periods between USV bouts. We  
903 bandpass filtered these recordings to the 40-100 kHz range (Hann filter with 100 Hz smoothing)  
904 to reduce extraneous background noise, and down sampled the recordings to 200 kHz.

905 Synthetic USV stimuli were generated using a customized MATLAB script that created artificial  
906 sine wave tones matching the spectro-temporal properties of naturalistic stimuli. Specifically,  
907 synthetic stimuli had the same rate (calls per minute), average duration, and mean frequency as  
908 naturalistic USVs (we used MUPET to characterize USV properties; Van Segbroeck et al., 2017).  
909 Tones were evenly spaced throughout the synthetic stimulus. Background noise was generated  
910 from the silent periods of the 3-minute vocalization recordings. Each recording session contained  
911 1 epoch of naturalistic USVs, 1 epoch of synthetic USVs, and 1 epoch with background noise. All  
912 acoustic stimuli were presented at ~70dB through a MF1-S speaker (Tucker Davis Technologies)  
913 placed 10cm away from both subjects.

#### 914 **Widefield imaging: Structured Sensory Environments**



915 Widefield imaging was performed as in the original (solo) condition. All stimuli were provided to  
916 the animals' left side. Recordings were 15-minutes long, divided into 90 trials of 8000ms duration.  
917 Trials were structured with a 3000ms baseline period, 2000ms stimulus period, and 3000ms post-  
918 stimulus period. Trials were separated by an inter-trial interval randomly drawn between 1000 and  
919 1750ms.

920 Air puffs (10psi) were gated by solenoids (NResearch, Solenoid valve, part #161K011) and were  
921 directed at the whisker pad in either the anterior-to-posterior or posterior-to-anterior direction.  
922 Visual stimuli were gratings of 2.1cm bar width, 100% contrast, delivered on a 10inch monitor  
923 (Eyoyo, 10-inch 1920x1200 IPS LED), positioned 14cm away from animals' left eye. Gratings  
924 drifted from medial-to-lateral or lateral-to-medial at 8 cycles per second. Visual stimuli were  
925 presented for 2000ms. During these recordings, mice also received trials of auditory stimuli (e.g.  
926 2 tones). These data were not analyzed since auditory cortex was not imaged and so no evoked  
927 response was observed. Each recording captured 30 trials of each stimulus modality. 3329 trials  
928 were captured in total across 9 animals: resulting in 1110 tactile, 1109 visual (and 1110 auditory)  
929 trials. 1 visual trial was lost due to timing issues.

930 Due to light-artifact of visual stimuli leaking through the ipsilateral cortical bone in a subset of  
931 recordings, a more conservative mask on the ipsilateral hemisphere was used for all sensory  
932 environment analyses (as shown in Fig. 6F). Accordingly, this mask was used for all analyses in  
933 Figures 6-7, including quantification of motifs in the original (solo) environment.

#### 934 **Statistical Analysis:**

935 All analyses were performed in MATLAB (Mathworks). Number of mice used was based on  
936 previously published studies (Makino et al., 2017; Allen et al., 2017; Mohajerani et al., 2013). As  
937 described throughout methods and main text, analyses were performed on 11 separate animals,  
938 across multiple recording sessions, and 4 behavioral environments (e.g. biological replicates).

939 Analyses were validated across a range of processing parameters (e.g. technical replicates). All  
940 statistical tests, significance values, and associated statistics are denoted in the main text. P-  
941 values below machine precision are reported as  $p < 10^{-16}$ . All 95% Confidence intervals were  
942 computed using MATLAB *bootci* function (1000 bootstrap samples).

### 943 **Widefield Imaging Preprocessing**

944 Image stacks were cropped to a 540x540 pixel outline of the cortical window. Images were aligned  
945 within and across recordings using user-drawn fiducials denoting the sagittal sinus midline and  
946 bregma for each recording. For anatomical reference (Figs. 1A and supplement 1), recordings  
947 were aligned to a 2D projection of the Allen Brain Atlas, version CCFv3 using bregma coordinates  
948 (Oh et al., 2014; ABA API interfacing with MATLAB adapted from [https://github.com/Sainsbury](https://github.com/SainsburyWellcomeCentre/AllenBrainAPI)  
949 [WellcomeCentre/AllenBrainAPI](https://github.com/SainsburyWellcomeCentre/AllenBrainAPI)). The complete 2D projection is shown in Fig. 1 Supplement 1.  
950 As they are only intended to be local references, the parcel outlines overlaid in Figures 1, 4, 5  
951 were created by manually tracing this 2D projection (Inkscape Vector Graphics Software).

952 Changes in fluorescence due to hemodynamic fluctuations may confound the neural activity  
953 captured by widefield imaging (Allen et al., 2017; Ma et al., 2016a, 2016b). However, previous  
954 work has found hemodynamic contributions to fluorescent signal using similar widefield imaging  
955 approaches are minimal (Cramer et al., 2019; Murphy et al., 2016; Vanni and Murphy, 2014) ,  
956 and can be mitigated by removing pixels corresponding to vasculature (Makino et al., 2017). To  
957 mitigate impact of hemodynamic contributions, we masked pixels corresponding to vasculature.  
958 To identify vasculature, the middle image of each recording was smoothed with a 2D median filter  
959 (neighborhood 125 pixels<sup>2</sup>) and subtracted from the raw image. As vasculature pixels are much  
960 darker than pixels of neural tissue, we created a vasculature mask by thresholding the reference  
961 image to pixels intensities  $\geq 2.5$  standard deviations below the mean. To remove noise, the mask  
962 was morphologically closed with a 2-pixel disk structuring element. A vasculature mask was

963 created for each recording. Supplemental experiments, outlined below, demonstrated that  
964 vascular masks successfully mitigated the contribution of hemodynamics to our signal.

965 Vasculature masks were combined with a manually drawn outline of the optically accessible  
966 cortical surface and applied to each recording to conservatively mask non-neural pixels. Masks  
967 removed the sagittal sinus, mitigating vascular dilation artifacts. Additionally, masks removed  
968 peripheral lateral regions, such as dorsal auditory cortex, where fluorescence contributions across  
969 animals may be differentially influenced by individual skull curvature. After alignment and  
970 registration, recordings were spatially binned to 135x135 pixels ( $\sim 68\mu\text{m}^2/\text{pixel}$ ). Masked pixels  
971 were ignored for spatial binning. Normalized activity was computed as change in fluorescence,  
972 e.g.  $\Delta F/F$  over time according to  $\frac{F-F_0}{F_0}$ . Baseline fluorescence,  $F_0$  was computed using a 9750ms  
973 (130 timepoints) rolling mean. To remove slow fluctuation in signal (e.g. due to change in  
974 excitation intensity), pixels traces were detrended using linear least squares fit.

975 Recordings were bandpass filtered at 0.1 to 4Hz (10<sup>th</sup> order Butterworth filter). Pixel traces were  
976 thresholded at 2 standard deviations per pixel in order to remove noise in spontaneous activity.  
977 Values below this threshold were set to zero. Thresholding had minimal impact on subsequent  
978 analyses and conclusions. For example, similar numbers of basis motifs ( $\sim 14$ ) were discovered  
979 in non-thresholded data. After filtering and thresholding, recordings were spatially binned again  
980 to a final size of 68x68 pixels ( $\sim 136\mu\text{m}^2/\text{pixel}$ ). Pixels with zero variance during an epoch (e.g.  
981 masked pixels) were ignored for all subsequent analyses. Subsequent factorizations require non-  
982 negative pixel values so recordings were normalized to range of 0 to 1 using the maximum and  
983 minimum pixel values per recording. The 12-minute solo and social recordings were divided into  
984 six, 2-minute epochs; alternating epochs were used for motif discovery or withheld for testing (Fig.  
985 1B). For solo recordings this resulted in 144 'discovery' and 144 'withheld' epochs.

986 For social recordings, cortices of individual animals were cropped to 540x540 pixels and  
987 preprocessing followed as above. Again, recordings were divided into 2-minute epochs, resulting  
988 in a total of 228 ‘discovery’ and ‘withheld’ epochs. Given the proximity of the animals, whiskers  
989 from one animal sometimes entered the imaging field of view of the paired animal, creating  
990 artifacts easily detected upon manual inspection. All epochs were manually inspected and epochs  
991 with any whisker artifacts (N=105) were removed, resulting in 123 ‘discovery’ and ‘withheld’  
992 epochs (8.2 hours in total).

993 For sensory trials, which were 8 seconds in length, each trial’s  $\Delta F/F$  was calculated using the  
994 mean of the first 26 timepoints (~2s) as baseline fluorescence. Burst in activity were discovered  
995 by thresholding traces at 1 standard deviation per pixel. All other preprocessing steps were  
996 followed as above.

### 997 **Multiwavelength Hemodynamic Correction**

998 Additional experiments using multiwavelength hemodynamic correction were performed to  
999 confirm that vasculature masking mitigated hemodynamic contributions to motifs (Fig. 4  
1000 supplement 2). Hemodynamic correction followed (Musall et al., 2019). In brief, widefield imaging  
1001 was performed while strobing between illumination with a blue LED (470nm, 0.4mW/mm<sup>2</sup>) and  
1002 violet LED (410nm, LuxDrive LED, part #A008-UV400-65 with a 405/10 clean-up bandpass filter;  
1003 Edmund Optics part #65-678). Each exposure was 35.5ms and light from both LEDs were  
1004 collimated and coupled to the same excitation path using a 425nm dichroic (Thorlabs part  
1005 #DMLP425). Illumination wavelengths alternated each frame. Strobing was controlled using an  
1006 Arduino Due with custom MOSFET circuits coupled to frame exposure of the macroscope (as in  
1007 Pinto et al., 2019). After vasculature masking and spatial-binning to 135x135 pixels, violet-  
1008 exposed frames (e.g. non-calcium dependent GCaMP6f fluorescence, Lerner et al., 2015) were  
1009 rescaled to match the intensity of blue-exposed frames.  $\Delta F/F$  was then computed as  $\Delta F/F_{\text{blue}} -$   
1010  $\Delta F/F_{\text{violet}}$ . Remaining preprocessing steps followed original (solo) experiments.

## 1011 **Motif Discovery**

1012 We used the *seqNMF* algorithm (MATLAB toolbox from Mackevicius et al., 2019) to discover  
1013 spatio-temporal sequences in widefield imaging data. This method employs convolutional non-  
1014 negative matrix factorization (CNMF) with a penalty term to facilitate discovery of repeating  
1015 sequences. All equations below are reproduced from the main text and Tables 1 and 2 of  
1016 Mackevicius et al (2019). For interpretability, we maintained the nomenclature of the original  
1017 paper where possible.

1018 We consider a given image as a  $P \times 1$  vector of pixel values and a recording image sequence (i.e.  
1019 recording epoch) as a  $P \times T$  matrix, where  $T$  is the number of timepoints in the recording. This  
1020 matrix can be factorized into a set of  $K$  smaller matrices of size  $P \times L$  representing short sequences  
1021 of events (e.g. *motifs*). Collectively this set of motifs is termed  $W$  (a  $P \times K \times L$  tensor).

1022 Each pattern is expressed over time according to a  $K \times T$  temporal weighting matrix termed  $H$ .  
1023 Thus, the original data matrix can be approximated as the sum of  $K$  convolutions between the  
1024 motifs in  $W$  and their corresponding temporal weightings in  $H$ :

$$1026 \quad X_{pt} \approx \tilde{X}_{pt} = \sum_{k=1}^K \sum_{\ell=0}^{L-1} W_{pk\ell} H_{k(t-\ell)} \equiv (W \circledast H)_{pt} \quad \text{equation 1}$$

1025

1027 Here,  $\circledast$  indicates the convolution operator. The values of  $W$  and  $H$  were found iteratively using  
1028 a multiplicative update algorithm. The number of timepoints for each motif was set to 13 frames  
1029 (975ms). This  $L$  value was chosen because it is well above the duration of GCaMP6f event  
1030 kinetics and qualitative assessment of imaging recordings suggested most spontaneous events  
1031 were  $< 1000$ ms in duration, agreeing with previous literature (Stringer et al., 2019a). Active  
1032 timepoints in motifs may be shorter than  $L$ ; in which case unused timepoints are zero-padded.  
1033 Preliminary tests at  $L > 13$  produced similar results to  $L=13$ , and explained variance captured by

1034 motifs reconstructions plateaued at  $L$  values  $\geq 13$  (Fig. 1 supplement 2C). As increasing  $L$   
1035 increased computation time,  $L=13$  was used for practical purposes.

1036

1037 The maximum number of possible motifs ( $K$ ) per recording was chosen by iteratively sweeping a  
1038 range of  $K$  values and evaluating the number of basis motif clusters at each value (see below  
1039 regarding basis motif clustering). Figure 4 supplement 1B shows the number of basis motifs  
1040 asymptotes at  $K \geq 12$ .  $K = 28$  was used for all motif discovery experiments.  $K = 28$  was chosen  
1041 as it was well above the elbow of the asymptote and produced a total number of basis motifs on  
1042 the upper range of the test  $K$  values (thus not analytically limiting the observe dimensionality). As  
1043 with  $L$ , if fewer than  $K$  motifs were found, the remaining motifs would be populated with zeros.  
1044 Again, we constrained  $K$  because computational demands when adding extra, unnecessary  
1045 (blank) motifs.

1046 The *seqNMF* algorithm improves upon typical CNMF by including a spatio-temporal penalty term  
1047 into the cost function of the multiplicative update algorithm. In brief, this reduces redundancy  
1048 between motifs: 1) multiple motifs do not describe the same sequence of activity; 2) a single motif  
1049 is not temporally split into separate motifs; and 3) motifs are encouraged to be non-overlapping  
1050 in time. This penalty termed is implemented as follows:

1051 
$$R = \lambda \left\| \left( W \overset{T}{\circledast} X \right) S H^T \right\|_{1, i \neq j}$$

1052 Here, temporal overlap (correlation) between motifs is captured by  $S H^T$ .  $S$  is a  $T \times T$  temporal  
1053 smoothing matrix where  $S_{ij} = 1$  when  $|i - j| < L$ ; otherwise  $S_{ij} = 0$ . Thus, each temporal  
1054 weighting in  $H$  is smoothed by a square window of length  $2L-1$ , increasing the product of motifs  
1055 that temporally overlap within that window.

1056 Competition between spatio-temporal structure of motifs is achieved by calculating the overlap of  
1057 motifs in  $W$  with the original data as follows

1058 
$$(W \circledast X)_{kt} = \sum_{\ell} \sum_p W_{pk\ell} X_{p(t+\ell)} \quad \text{equation 3}$$

1059 Motifs containing similar patterns will overlap with the original data matrix at the same times. The  
1060 notation  $\|\cdot\|_{1,i \neq j}$  ignores penalizing terms along the diagonal such that spatial and temporal  
1061 autocorrelation of motifs is not penalized.  $\lambda$  is a tunable parameter that controls the magnitude of  
1062 the penalty term. The result of this penalty, when implemented as a cost function in the  
1063 multiplicative update algorithm for fitting  $H$  and  $W$ , is to bias factorization such that only one motif  
1064 is active at a given timepoint.

1065 We followed the approach used by Mackevicius et al., to determine the magnitude of the  $\lambda$  penalty  
1066 term.  $\lambda$  was swept across 6 orders of magnitude from  $10^{-6}$  to 1 (Fig. 1 supplement 2A). The impact  
1067 on reconstruction cost, motif spatio-temporal correlation, explained variance, and number of  
1068 factors was evaluated. A value slightly above the cross-over point in reconstruction cost and  
1069 explained variance was chosen for subsequent experiments (Fig. 1 supplement 2A). Importantly,  
1070 a similar number of motifs were found for all values of  $\lambda$ , suggesting our results did not depend  
1071 on the exact value.

1072 Additionally, the *seqNMF* algorithm contains optional orthogonality constraints to bias  
1073 factorizations towards parts-based and events-based factorizations. In widefield imaging data,  
1074 parts-based would preferentially detect spatially independent motifs. Events-based factorizations,  
1075 used in this study, would preferentially discover temporally independent motifs that correspond to  
1076 specific instantiations of sequential activity patterns. This was achieved with an additional  
1077 smoothed orthogonality cost term penalizing overlap in motif temporal weightings:

1078 
$$R_{Hortho} = \frac{\lambda_{Hortho}}{2} \|HSH^T\|_{1,i \neq j} \quad \text{equation 4}$$

1079 The magnitude of  $\lambda_{orthoH}$  was set to 1 based on preliminary experiments and remained  
1080 unchanged for all motif discovery experiments, including the parameter sweeps of  $\lambda$  and  $K$

1081 described above. All fitting processes were run for 300 iterations; at which point the cost function  
1082 leveled out (Fig. 1 supplement 2B).

1083 Supplemental Table 1 contains a complete list of all adjustable parameter values of the seqNMF  
1084 algorithm toolbox used for each experiment. Descriptions for parameters not discussed above  
1085 can be found in original work. To discover motifs in paired social recordings, the same  $K$  and  $L$   
1086 values (28 and 13) were used.  $\lambda$  was refit following the procedure described above.

1087 Note, one change was made to the *seqNMF* algorithm toolbox. For convenience, the smoothing  
1088 matrix  $S$  was multiplied by 0.01. Specifically, line 98 of original seqNMF code: `smoothkernel =`  
1089 `zeros(1,(2*L)-1)` replaced with `smoothkernel = 0.01*zeros(1,(2*L)-1)`. This allowed  $\lambda$  values to be  
1090 100x larger and, therefore, easier to read.

### 1091 **Visualizing Motif Activity Flow**

1092 To aid in visualization of motif patterns (Figs. 1 and 3), we used the Horn-Schunck optical flow  
1093 method to calculate the velocity vector fields between subsequent timepoints of motifs (Horn and  
1094 Schunck, 1981; implemented using *HS* function from OFAMM MATLAB toolbox, Afrashteh et al.,  
1095 2017). For basis motif images, optical flow was only performed for timepoints with non-zero  
1096 variance across pixels. For all plots, arrows depict the direction and velocity of flow for the top  
1097 50% intensity pixels of each timepoint. The number of arrows were downsampled by a factor of  
1098 three for clarity in visualization.

### 1099 **Comparing Motifs to sPCA and sNMF**

1100 Data preprocessing for Motif, sPCA, and sNMF discovery was identical. For sPCA, pixels were  
1101 treated as variables and timepoints as observations. sNMF was performed by setting  $L$  to 1  
1102 (effectively reducing *equation 1* to matrix multiplication) and removing all temporal and spatial  
1103 sparsity terms.



## 1104 **Refitting Motifs to Withheld Data**

1105 To refit motifs to withheld data, we used the same *seqNMF* algorithm, but  $W$  was fixed to the  
1106 previously discovered motifs (or basis motifs) during fitting. Thus, the only updatable features of  
1107 the factorization were motif temporal weightings,  $H$ . See Supplemental Table 1 for a list of all  
1108 parameters used during fitting. Importantly, since only temporal weightings were refit,  $\lambda$  was set  
1109 to zero. Thus, unlike motif discovery where motifs were highly spatially and temporally  
1110 independent, refit motifs did not have this constraint and thus some combinatorial motif activation  
1111 was observed. However, increasing  $\lambda_{Hortho}$  had little impact on the percent of variance explained  
1112 when refitting the motifs, suggesting that any compositionality had minimal impact on results (Fig.  
1113 3 supplement 1). Importantly, all motifs, static networks, and time-varying networks were refit to  
1114 withheld data in the same way and therefore their percent explained variance can be directly  
1115 compared.

1116 For solo and social recordings, the part-based factorization orthogonality bias was maintained as  
1117 in initial discovery (see Supplemental Table 1). Given the short duration of sensory trials, the  
1118 orthogonality bias was not used. The same process was followed for refitting basis motifs and  
1119 social basis motifs to withheld data. For all refitting processes, motifs and withheld data were first  
1120 spatially smoothed with a 2D gaussian filter ( $\sigma = [1,1]$ ). Only pixels with non-zero variance in both  
1121 motifs and withheld data were used.

## 1122 **Generating Basis Motifs**

1123 To identify basis motifs, we used an unsupervised clustering algorithm (Phenograph, Nicosia et  
1124 al., 2009; Levine et al., 2015). For clustering, motifs were renormalized to 0-to-1 and  
1125 spatiotemporally smoothed with a 3D gaussian filter ( $\sigma = [1,1,0.1]$ ). The Phenograph algorithm  
1126 generates a directed graph, where each node is connected to its  $k$  nearest neighbors. Louvain  
1127 community detection is then performed on this graph to cluster nodes into groups. For finding

1128 neighbors, distances between motifs were computed as the peak in their temporal cross-  
1129 correlation. The only tunable parameter of Phenograph is the number of nearest neighbors ( $k$ ).  
1130  $k=15$  was chosen based on initial experiments. Similar number of clusters (10-20) were observed  
1131 for  $k=10$  and  $k=20$ .

1132 Basis motifs were generated by taking the mean of the core community of motifs in each cluster.  
1133 The core community was defined as the top 10% of motifs in each cluster with the most within-  
1134 cluster nearest neighbors. Prior to averaging, motifs were aligned to a 'template' motif. The  
1135 template motif shared the most zero-lag peak temporal cross-correlations with all other motifs. If  
1136 there were multiple templates, one was chosen at random. All motifs were zero-padded to a  
1137 length of  $3L$  (39 timepoints) and aligned to these templates by their maximal cross-correlation  
1138 lag and then basis motifs calculated from the core communities. Basis motifs were then aligned  
1139 to one another by shifting the center of mass of activity to the middle timepoint. Timepoints with  
1140 no variance across all basis motifs were removed, resulting in basis motifs that were 26  
1141 timepoints ( $\sim 2s$ ) long.

#### 1142 **Percent Explained Variance Calculations**

1143 For all experiments, the percent explained variance (PEV) in neural activity was defined as

$$1144 \quad PEV = 100 * \left( 1 - \frac{(\sigma_X^2 - \sigma_{\bar{X}}^2)}{\sigma_X^2} \right)$$

1145 Where  $\sigma_X^2$  and  $\sigma_{\bar{X}}^2$  denote the spatio-temporal variance of the original data and reconstructed  
1146 data respectively.

1147 The PEV of individual motifs was calculated by convolving the motif with its temporal weighting  
1148 and computing PEV as above (see *helper.reconstruct* function from *seqNMF* toolbox). Thus, the  
1149 PEV of individual motifs reflected both the frequency of motif occurrence and the quality of fit to

1150 the data. Relative PEVs of individual motifs were calculated by dividing the PEV of each motif by  
1151 the total PEV across all motifs for that epoch.

1152 Timepoint-wise PEV (Fig. 3 supplement 1B) used the same calculation as above but was  
1153 performed separately on each timepoint of an epoch. Thus, these analyses reflect solely the  
1154 spatial variance in activity captured by reconstructed data for each individual timepoint.

### 1155 **Cross-Temporal Autocorrelation Analysis**

1156 The cross-temporal autocorrelation of each motif was calculated by computing the spatial  
1157 correlation between frames of the motif at vary temporal lags. The resulting autocorrelation was  
1158 then fit with an exponential to estimate the half-life of decay in the autocorrelation ( $\tau$ ). Pixels with  
1159 no variance across motif timepoints were ignored when calculating correlation.

### 1160 **Static Networks**

1161 Static networks were generated for each motif by replacing all of the active timepoints of a motif  
1162 with the mean activation of that motif (see Fig. 3E for example). Active timepoints were defined  
1163 as any timepoints with variance across pixels greater than zero. Thus, static networks represent  
1164 a constant 'state' of activation of the same brain regions for the duration of that motif. The temporal  
1165 weightings of these static networks were refit to the withheld data the same way as dynamic motifs  
1166 (i.e. the activation of these states could vary throughout an epoch; described above).

### 1167 **Estimating the Working Resolution of Widefield Imaging**

1168 One concern is that the spatial resolution of our approach may have artificially limited the  
1169 dimensionality of the observed motifs. Therefore, we sought to estimate the 'working resolution'  
1170 of our approach by grouping pixels into functional clusters, defined as contiguous groups of pixels  
1171 with correlated activity (Fig. 4 supplement 3).

1172 To identify functional clusters, we divided each recording epoch into 1 second time periods  
1173 (17,280 total 1-second periods, each with 13 frames). A pixelwise correlation matrix was  
1174 computed for each 1-second period. Next, PCA was applied to each correlation matrix, producing  
1175 a (pixel x component) matrix of ‘eigenconnectivities’. These eigenconnectivities reflected the  
1176 dominant correlation patterns across pixels during that 1-second period (similar to approaches by  
1177 Leonardi et al., 2013; Preti and Ville, 2017)

1178 The first eigenconnectivity from each 1-second time period were concatenated together, creating  
1179 a (pixel x 17,280) matrix that captured the wide variety of different possible spatial patterns across  
1180 the cortex. We then used Phenograph (k=15) to group pixels according to their correlation across  
1181 these spatial patterns. This produced 37 ‘functional clusters’ of highly correlated pixels (Fig. 4  
1182 supplement 3; 18 in left and 19 in right hemisphere. Similar results (~20 clusters per hemisphere)  
1183 were observed by performing PCA on each 1-second time period and then clustering as above  
1184 (i.e. without first creating a correlation matrix; this creates an ‘eigenimage’ instead of an  
1185 ‘eigenconnectivity’ as in Friston, 2004)

1186 Several lines of evidence suggest our motifs were not constrained by the functional resolution of  
1187 our approach. First, as shown in Figures 1, 3, and 4, most motifs are dynamic – different regions  
1188 are activated over time. This suggests motifs are not limited by the spatial resolution of our  
1189 approach, as the motifs capture the flow of activity across distinct spatial regions. Second, our  
1190 imaging approach can still capture pixel-wise activity (Fig. 7B), suggesting the functional  
1191 clustering is a lower-bound on our resolution. Even using this lower bound, the dimensionality of  
1192 our motifs is far less than the possible dimensionality of our approach. For example, even if motifs  
1193 engaged only 1-2 functional clusters, there are still  $18^2=324$  possible patterns.

#### 1194 **Quantifying Spontaneous Behavioral States**

1195 Behavioral state was quantified using the binarized intensity of nose motion energy, whisker pad  
1196 motion energy, and total limb speed. Nose and whisker pad motion energy was quantified as  
1197 the mean absolute temporal derivative of pixels within a manually selected ROIs (shown on Fig.  
1198 5A). The whisking speed of the mouse was faster than the frame rate of the behavioral videos.  
1199 This caused the whiskers to be blurred when the animal was intensely whisking, resulting in a  
1200 low value for the whisker energy measure. Therefore, whisking motion energy was inverted for  
1201 all analyses (e.g.  $M_{whisk} = \max(M_{whisk\ original}) - M_{whisk\ original}$ ) so that the axes were  
1202 consistent across the three behavioral variables (i.e. higher values indicate higher energy).

1203 Markerless tracking of paw position (DeepLabCut; Mathis et al., 2018) was used to measure  
1204 limb speed. Training and validation of DeepLabCut neural network followed Nath et al.'s, 2019  
1205 published protocol, with the network trained to identify paw position as the center point between  
1206 the 1<sup>st</sup> and 5<sup>th</sup> digit of each paw. To improve accuracy of limb position estimates, nose, tail base,  
1207 and tail root were also tracked. 360 frames from 3 animals were used for network training. One  
1208 refinement iteration was performed. The network was trained until loss plateaued (Fig. 5  
1209 supplement 1C, 120000 iterations). Total limb speed was calculated as the summed absolute  
1210 temporal derivatives of the x and y position of all four paws.

1211 To categorize behavioral state, a gaussian mixture model (GMM) was fit to the distributions of  
1212 these three behavioral variables (MATLAB; *fitgmdist* function; 2 components). Timepoints were  
1213 assigned to one of two behavioral states according to the 2-second running product of the  
1214 posterior probability of being in each state. Any timepoints with a likelihood of being in either  
1215 state that was less than 0.5 were excluded from analysis (this was less than 0.01% of all  
1216 timepoints in both animals).

1217 To decode behavioral state based on motif activity, we used a support vector machine classifier  
1218 with radial basis function kernels (MATLAB; *fitsvm* function; Sequential Minimal Optimization  
1219 solver). Prior to training a classifier, 20% of each trial type was held out as a validation test data

1220 set. For each classifier, two hyperparameters, “box-constraint” (a regularization parameter to  
1221 prevent overfitting) and “kernel scale” were tuned using cross validation within the training set  
1222 data (5 folds, balanced trial types: using the MATLAB functions *fitsvm* and *cvpartition*).  
1223 Hyperparameters were optimized using Bayesian optimization (MATLAB, *bayesopt* function).  
1224 Tuned classifiers were then tested on withheld validation data. Classifier accuracy was  
1225 quantified using the area under the curve (AUC) of the receiver operator characteristic function  
1226 (MATLAB, *perfcurve* function). Results of this classification analysis are reported in the main  
1227 text.

### 1228 **Fitting Average Traces to Sensory Trials**

1229 Average stimulus responses were calculated by taking the mean of all trials across animals for  
1230 visual and tactile stimuli. Different stimuli within a modality were combined to generate the  
1231 average trace (e.g. visual grating 1 and 2 were averaged together). Temporal weightings of  
1232 average traces were refit to trials using the same seqNMF algorithm and parameters as when  
1233 refitting basis motifs, except now the average stimulus response was used in place of the motifs.  
1234 Additionally, prior to fitting, trials were zero-padded which allowed the algorithm to flexibility shift  
1235 the average trace timing to best match the evoked response timing of each trial. This allowed us  
1236 to directly compare the PEV of the motifs and the average stimulus response.

### 1237 **Comparing Stimulus Evoked Motif Responses**

1238 We sought to compare the motif responses evoked by different stimuli (Fig. 6D-E). Motif activity  
1239 was estimated by convolving each motif with its temporal weight on each trial (as described above;  
1240 see *seqNMF Toolbox helper.reconstruct* function). Stimulus selectivity of a motif was estimated  
1241 by comparing the evoked responses to each stimulus (two-sample t-test). This was done over  
1242 time, using 300ms windows, stepped every 150ms to give a timecourse of similarity. Resulting

1243 p-values were Bonferroni corrected for multiple comparisons across time and conditions (i.e. 24  
1244 comparisons in Fig. 6D-E, 12 windows x 2 modalities).

### 1245 **Pixelwise Classifier Analysis Comparing Visual Stimuli**

1246 As described above, mice were presented with two different visual stimuli: visual stimulus 1  
1247 (grating drifting from medial-to-lateral) and visual stimulus 2 (grating drifting from lateral-to-  
1248 medial). Mice received 15 trials of each stimulus on 4-5 consecutive recording days (60-75 total  
1249 of each type per mouse). As described in the main text, the response of the 'visual' motif (#10)  
1250 did not differ between the two stimuli. To test whether this was due to a limitation in our imaging  
1251 approach, we tested whether we could classify neural responses as belonging to the two stimuli  
1252 (Fig. 7B)

1253 To classify stimulation response, we used a support vector machine classifier (see detailed  
1254 description above). Classification was performed on pixels restricted to the right hemisphere  
1255 (contralateral to stimulus) and in the top 95% intensity percentile of motif 10 (visually-evoked  
1256 motif). This resulted in a total of 6006 possible feature pixels (231 pixels across the 26 timepoints  
1257 of visual stimulus presentation). For each classifier, we performed a cross-validated ANOVA  
1258 feature selection to select a subset of these pixels as classification features (Pereira et al., 2009).  
1259 The p-value for a one-way ANOVA comparing responses to each stimulus type was computed  
1260 for each pixel in the training data. The 50 pixels with the highest  $-\log_{10}(\text{p-values})$  were used for  
1261 classification. After determining the feature vector, the classification hyperparameters were tuned  
1262 within the training data, as described above.

1263 For each mouse, pixelwise classification was performed on two datasets (Fig. 7B). First it was  
1264 performed on the original data (after the preprocessing steps above). Second it was performed  
1265 on the reconstructed activity of the motifs fitted to this original data. Thus, for both classification  
1266 procedures, the data were the same spatial resolution. The only difference between the data sets

1267 were the residuals of the motif fitting procedure. Therefore, a total of 18 classifiers were trained  
1268 (2 per animal).

### 1269 **Evaluating Motif Expression During Two Tactile Stimuli**

1270 Animals were also presented with two different tactile stimuli; airpuffs that either traveled from  
1271 anterior to posterior or from posterior to anterior. Motifs captured the vast majority of explainable  
1272 variance in the response to tactile stimuli. In particular, Motif 1 (tactile-specific; Fig. 6E) captured  
1273 a large portion of response to both stimuli (Fig. 6 supplement 1; 61.08% +/-1.97% SEM for non-  
1274 stimulus specific motifs; 36.90% +/- 1.90% SEM for stimulus-specific motif 1).

1275 However, it is important to note that, unlike the visual stimuli, these two tactile stimuli were likely  
1276 significantly different in their impact on behavior. First, the behavioral connotation of an anterior-  
1277 approaching stimulus is likely different than that of a posterior stimulus. Second, although both  
1278 airpuffs were directed at the whisker pad, differences in the solenoids used to control the airflow  
1279 impacted flow rate and air pressure. Thus, one may expect these stimuli to evoke different  
1280 intensity responses (and thus different motif temporal weightings). Consistent with this  
1281 hypothesis, the relative percent variance in neural activity captured by motifs differed in response  
1282 to the two airpuffs (Fig. 7 supplement 1A). Because of these large differences at the level of  
1283 motifs, there was no need for to classify the tactile stimuli. However, stimulus-specific activity in  
1284 the residuals still only captured a small part of the total explainable variance (2.02% +/- 0.38%  
1285 SEM; Fig. 7 supplement 1B). Thus, as we saw for visual stimuli, most cortex-wide neural activity  
1286 can be explained by the expression of motifs.

1287

1288

1289



1290

1291

1292

1293

1294

1295 **Supplemental Information:**

1296 **Supplemental Movie 1. Example Widefield Imaging of Cortical Activity.** Shows an  
1297 example of widefield imaging (left) alongside a video of animal's behavior (right).

1298 **Supplemental Movie 2. Example Fit of Data Reconstructed from Discovered Motifs. (A)**

1299 Temporal weightings of discovered motifs. **(B)** Original data. Color indicates fluorescence

1300 intensity of original data (i.e.  $\hat{F}_O$ : normalized between 0 to 1, using the 99.9<sup>th</sup> percentile of all

1301 pixels). **(C)** Reconstructed data. Created by convolving motifs with their temporal weightings (see

1302 Method for details). Color indicates intensity of reconstructed data ( $\hat{F}_R$ ); color scale follows **B**. **(D)**

1303 Residual of fit (i.e.  $\hat{F}_O - \hat{F}_R$ ). Color scale indicates the quality of fit of reconstructed to original data.

1304 Red dots indicate bregma.

1305 **Supplemental Movie 3. All Basis Motifs.** Basis motif display follows Figure 4C. For video

1306 visualization, all motifs were convolved with a 450ms gaussian temporal weighting vector to mimic

1307 a 'spike' in activity.

1308

1309

1310

1311

1312

1313

1314

1315

1316

1317

1318

1319

1320

1321

1322

1323

1324

1325

|                                      | Discovery:<br>Solo | Fit:<br>Solo           | Fit:<br>Paired<br>Social | Fit:<br>Sensory        | Discovery:<br>Paired<br>Social | Fit:<br>Paired<br>Social      |
|--------------------------------------|--------------------|------------------------|--------------------------|------------------------|--------------------------------|-------------------------------|
| <b>K</b>                             | 28                 | 14<br>(# basis motifs) | 14<br>(# basis motifs)   | 14<br>(# basis motifs) | 28                             | 11<br>(# social basis motifs) |
| <b>L</b>                             | 13                 | 13                     | 13                       | 13                     | 13                             | 13                            |
| <b><math>\lambda</math></b>          | 0.0005             | 0                      | 0                        | 0                      | 0.003                          | 0                             |
| <b><math>W_{init}</math></b>         | Random             | Basis Motifs           | Basis Motifs             | Basis Motifs           | Random                         | Complex Basis Motifs          |
| <b><math>H_{init}</math></b>         | Random             | Random                 | Random                   | Random                 | Random                         | Random                        |
| <b><math>\lambda_{orthoH}</math></b> | 1                  | 1                      | 1                        | 0                      | 1                              | 1                             |
| <b><math>\lambda_{orthoW}</math></b> | 0                  | 0                      | 0                        | 0                      | 0                              | 0                             |
| <b>Iterations</b>                    | 300                | 100                    | 100                      | 100                    | 300                            | 100                           |
| <b>Tolerance</b>                     | 0                  | 0                      | 0                        | 0                      | 0                              | 0                             |
| <b>Shift</b>                         | 0                  | 0                      | 0                        | 0                      | 0                              | 0                             |
| <b><math>W_{AL1}</math></b>          | 0                  | 0                      | 0                        | 0                      | 0                              | 0                             |
| <b><math>H_{AL1}</math></b>          | 1                  | 0                      | 0                        | 0                      | 1                              | 0                             |
| <b><math>W_{fixed}</math></b>        | 0                  | 1                      | 1                        | 1                      | 0                              | 1                             |
| <b>SortFactors</b>                   | 0                  | 0                      | 0                        | 0                      | 0                              | 0                             |
| <b><math>W_{update}</math></b>       | 1                  | 0                      | 0                        | 0                      | 1                              | 0                             |

1326

1327 **Supplemental Table 1. CNMF parameters used in each experiment.** See methods for  
 1328 descriptions of parameter choices and fitting procedures. For complete details refer to seqNMF  
 1329 MATLAB Toolbox (Mackevicius et al., 2019).

1330

1331

1332

1333

1334

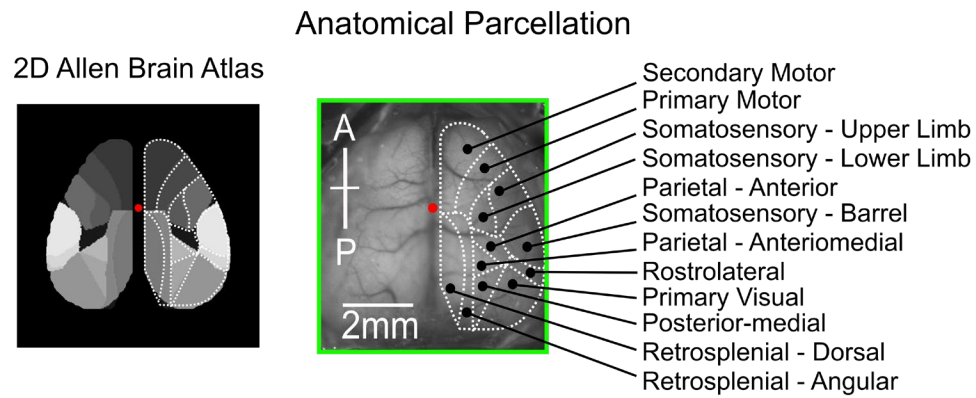

1335

1336 **Figure 1, Supplement 1. Detailed anatomical parcellation. Left:** 2D projection of Allen Brain  
1337 Atlas anatomical parcellation. **Right:** Allen Brain Atlas anatomical region labels overlaid on  
1338 example mouse brain. Dotted white lines indicate manually drawn region outlines overlaid on  
1339 motifs in main figure text.

1340

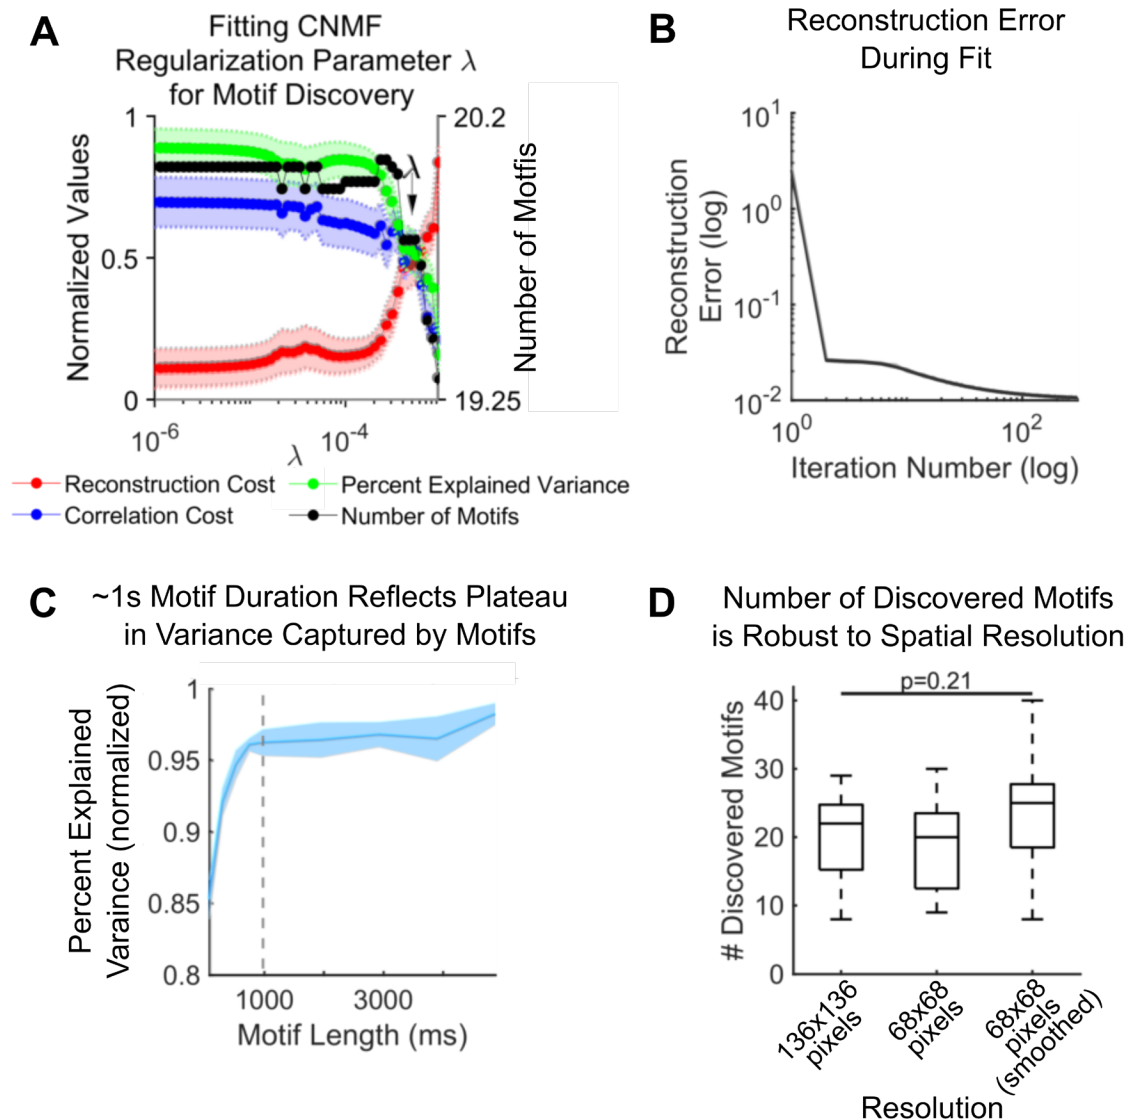

1341

1342 **Figure 1, Supplement 2. Testing impact of CNMF parameters on motif discovery. (A)** The

1343 effect of changing the spatio-temporal regulation parameter ( $\lambda$ ) in the CNMF algorithm on

1344 reconstruction cost (red), correlation cost (blue), explained variance (green) and number of

1345 identified motifs (black). Each data point indicates the mean value from 20 fit epochs (randomly

1346 selected; no replacement); shaded regions indicate SEM. Y-axis units are arbitrary; values were

1347 normalized between 0 and 1 across  $\lambda$  values for each of the 20 fits. Chosen  $\lambda$  is indicated by

1348 arrow. **(B)** Reconstruction error as a function of iteration number of CNMF algorithm. All motif

1349 discovery factorizations were run for 300 iterations, at which point there was minimal improvement

1350 in reconstruction error. **(C)** Post-hoc validation of choice of motif duration. Motifs were discovered  
1351 using motif durations up to 5 seconds. 1 second motifs captured comparable variance to longer  
1352 motif durations. Shaded regions and dark line show mean and SEM, respectively. **(D)** Spatial  
1353 resolution did not change number of discovered motifs. Spatial resolution indicated along x-axis.  
1354 When smoothed, a 2D gaussian filter ( $\sigma = [1,1]$  pixels; see Methods for details) was convolved  
1355 across each frame. Line, box, and whiskers denote median, 25<sup>th</sup>-75<sup>th</sup> percentile, and range  
1356 respectively. Significance estimated with one-way ANOVA.

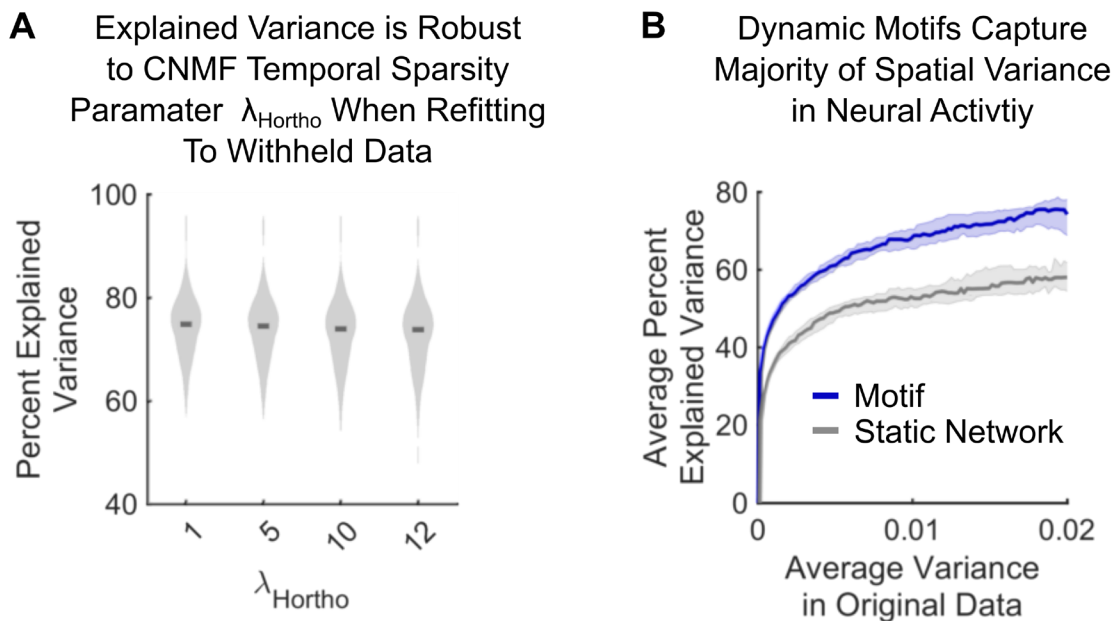

1357  
1358 **Figure 3, Supplement 1 (A)** Percent of variance in neural activity explained by motif  
1359 reconstructions as a function of temporal sparsity parameter  $\lambda_{\text{Hortho}}$ . Full distribution shown. Dark  
1360 lines indicate median. **(B)** Percent of variance in neural activity explained by motif reconstructions  
1361 (purple) and static networks (gray) of withheld epochs per timepoint. The explained variance was  
1362 separately calculated for each timepoint of each epoch (1560 timepoints per epoch, 144 epochs;  
1363 see Methods for details). Timepoints were then binned according to the variance across the image

1364 in the original data (100 equal bins). The explained variance captured by the reconstruction was  
1365 averaged per bin per epoch. Dark lines indicate median of 144 epochs. Shading indicates 95%  
1366 confidence interval. Analyses performed on withheld data within the same animals (as in Fig. 3D;  
1367 purple).

1368

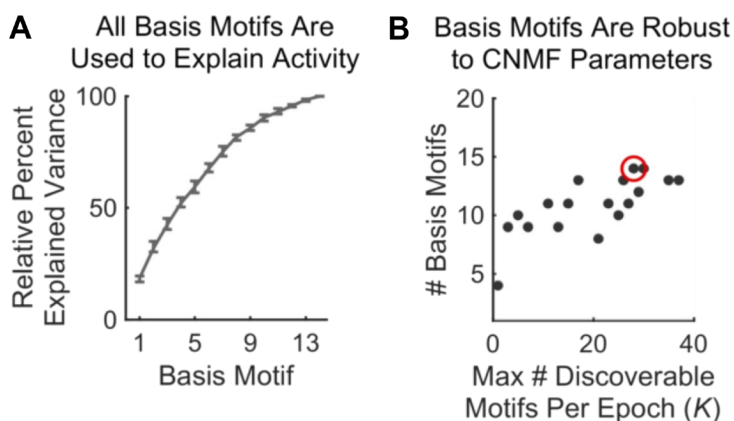

1369

1370 **Figure 4, Supplement 1. Additional characterizations of basis motifs (A)** Cumulative sum of  
1371 relative percent explained variance of basis motifs. Relative PEV was defined as the fraction of  
1372 total PEV (of all motifs) captured by each motif per epoch. Basis motifs are in descending order  
1373 by their relative PEV; these labels are used for basis motifs throughout manuscript. Line and error  
1374 bars denote mean and 95% CI, respectively. **(B)** Number of basis motifs discovered (y-axis) as a  
1375 function of CNMF hyperparameter  $K$ , the maximum number of discoverable motifs allowed in a  
1376 single epoch (x-axis). Motif discovery and clustering was repeated for each  $K$  value (see Methods  
1377 for details). Regardless of parameters, 10-14 basis motifs were identified. Red circle denotes  $K$   
1378 value (28) used for all experiments in the main text, conservatively chosen to maximize the  
1379 number of basis motifs discovered.

1380



### Hemodynamics Contributed Minimally to Motifs

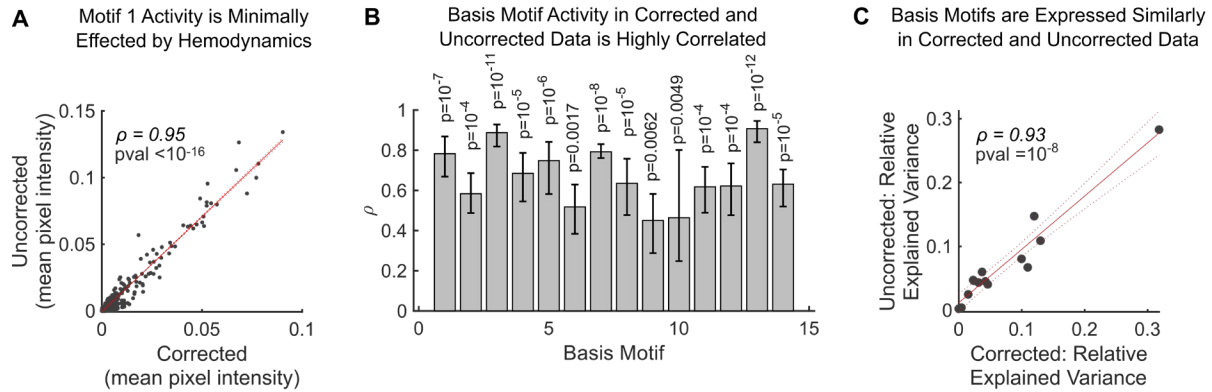

1381

1382 **Figure 4, Supplement 2. Multiwavelength hemodynamic correction. (A)** Example correlation

1383 between average pixel intensity of motif 1 reconstruction before and after multiwavelength

1384 hemodynamic correction (see Methods for details). Gray markers represent mean pixel intensity

1385 per timepoint. Solid and dotted red lines show linear least squares fit and 95% confidence bounds

1386 respectively. **(B)** The correlation in activity between corrected and uncorrected data was high for

1387 all motifs. Correlation is shown for N=30 2-min epochs across 2 animals. Mean and confidence

1388 intervals calculated on fisher z-transformed data before reconverting to Pearsons correlation

1389 coefficient. **(C)** Average relative variance explained by motifs in corrected and uncorrected

1390 epochs. Data points show mean of N=30 2-min epochs. Display follows **A**.

1391

## Functional Parcellation of Mouse Cortex

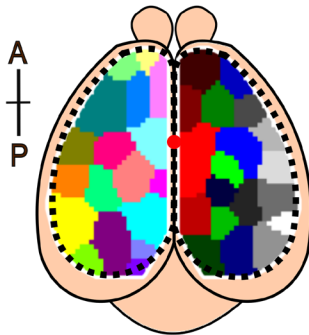

1392

1393 **Figure 4, Supplement 3. Estimating the ‘working resolution’ of widefield imaging approach.**

1394 Parcellation of mouse cortex into functional clusters (N = 18 and 19 for left and right hemisphere,  
1395 respectively). Functional clusters grouped pixels that were correlated over time (see Methods for  
1396 details). Each color denotes a separate functional cluster. Red dot indicates bregma.

1397

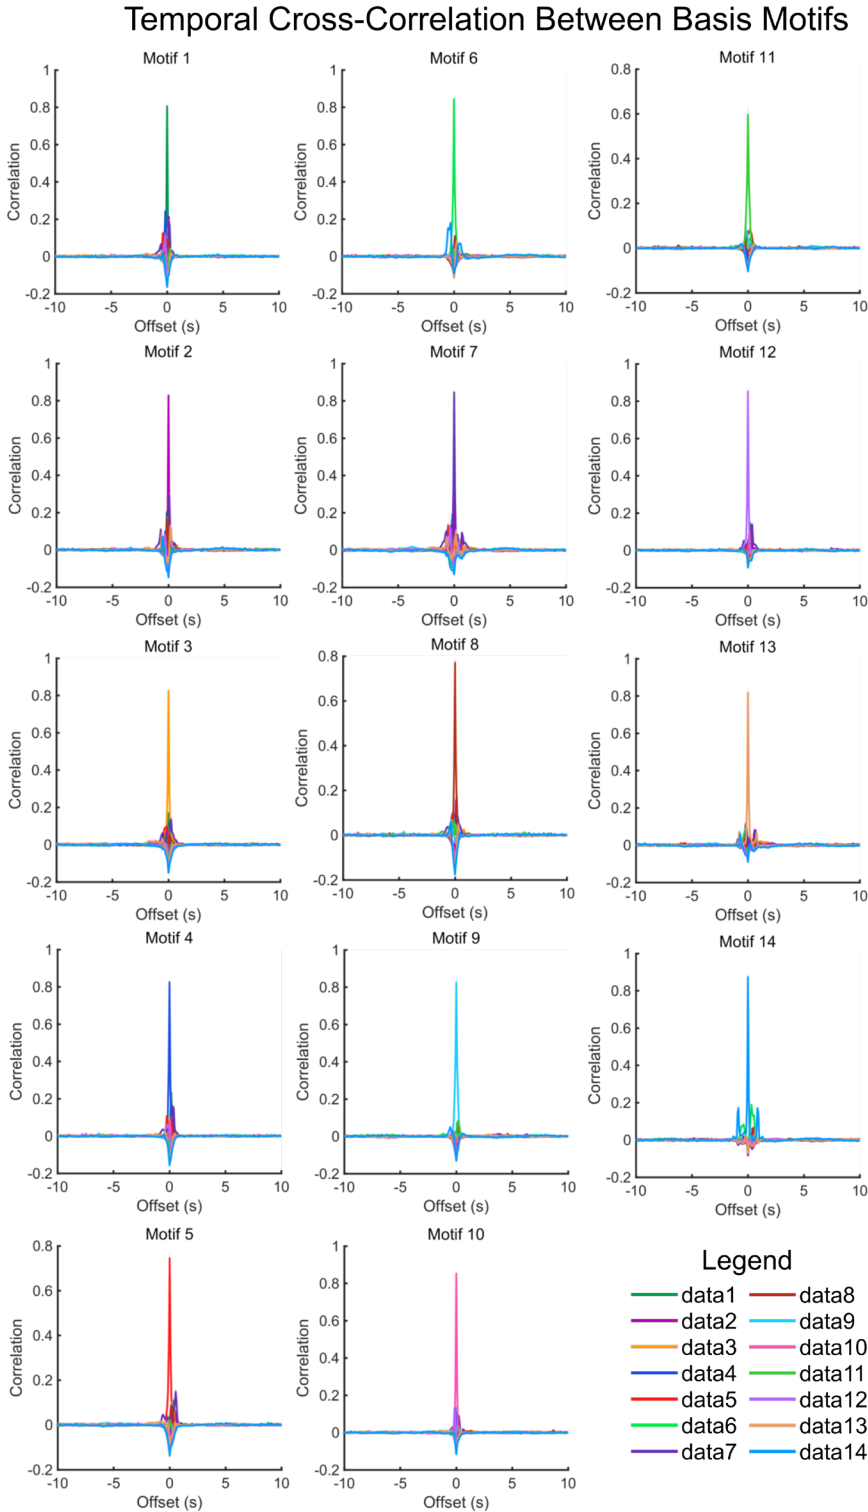

1398

1399 **Figure 4, Supplement 4. Temporal cross correlation between motifs.** Temporal cross-  
1400 correlations (and autocorrelations) performed on the temporal weightings of basis motifs refit to

1401 N=144 withheld epochs. Line and shading reflect mean and SEM respectively. No obvious  
1402 hierarchical structure was observed in the activation of different motifs.

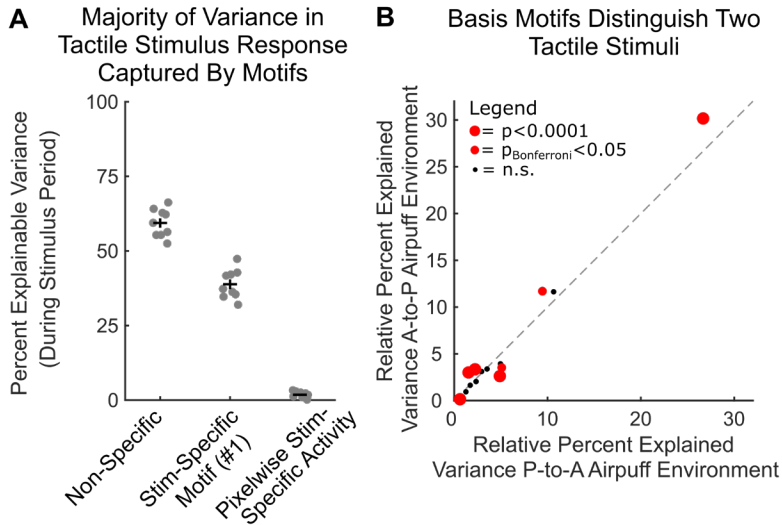

1403

1404 **Figure 7, Supplement 1. Basis motif expression differs in response to two tactile stimuli.**

1405 **(A)** The majority of variance in neural activity could be explained by motif activity, not stimulus-  
1406 stimulus-specific activation. Plot shows the percent of explainable variance in the neural response to tactile  
1407 stimuli that is captured by non-specific motifs (left column), the stimulus specific motif (motif 1;  
1408 middle column) and stimulus-specific residuals (right column). Follows Figure 7C. Data points  
1409 correspond to mice (N=9). Black horizontal bars indicate mean and vertical bars indicate SEM.  
1410 **(B)** Plot shows the relative percent explained variance for each basis motif in response to anterior-  
1411 to-posterior airpuffs and a posterior-to-anterior airpuffs directed at the whisker pad. Presentation  
1412 follows Figure 6B.

1413
